# Supplementary material for: Resistance of Tick Gut Microbiome to Anti-Tick Vaccines, Pathogen Infection and Antimicrobial Peptides
Source: Pathogens. 2020 Apr 22;9(4):309. doi: 10.3390/pathogens9040309 (PMC7238099; doi:10.3390/pathogens9040309)
Supplement: Supplementary file 1 [file pathogens-09-00309-s001.zip]

Archive with 4 entries (4 files):
- Supplementary materials R1.pdf
- Table S1.xlsx
- Table S2.xlsx
- Table S3.xlsx
