# Supplementary material for: Resistance of Tick Gut Microbiome to Anti-Tick Vaccines, Pathogen Infection and Antimicrobial Peptides
Source: Pathogens. 2020 Apr 22;9(4):309. doi: 10.3390/pathogens9040309 (PMC7238099; doi:10.3390/pathogens9040309)
Supplement: Supplementary file 1 [file pathogens-09-00309-s001.zip › Table S1.xlsx]

## Sheet: core-features-100% - core-featu
#	Taxonomy (genus level)	Percentiles frequency (Taxa abundance; log)
		0.02	0.09	0.25	0.5	0.75	0.91	0.98
1	Bacteria;Firmicutes;Bacilli;Bacillales;Planococcaceae;Lysinibacillus	1.06819	3.49402	1.84198	4.04616	4.35085	6.48727	6.6719
2	Bacteria;Proteobacteria;Gammaproteobacteria;Betaproteobacteriales;Burkholderiaceae;__	1.27184	3.67385	4.0304	3.44537	3.76548	16.005	6.09344
3	Bacteria;Firmicutes;Bacilli;Bacillales;Staphylococcaceae;Staphylococcus	3.38846	16.6506	4.04238	3.33985	5.67244	15.895	15.9974
4	Bacteria;Actinobacteria;Actinobacteria;Corynebacteriales;Corynebacteriaceae;Corynebacterium	3.61257	3.86764	2.20817	3.319	3.5346	3.70094	15.8486
5	Bacteria;Proteobacteria;Gammaproteobacteria;Xanthomonadales;Xanthomonadaceae;Stenotrophomonas	4.118	4.46268	4.67094	3.22453	6.27021	6.46549	6.48781
6	Bacteria;Proteobacteria;Gammaproteobacteria;Pseudomonadales;Pseudomonadaceae;Pseudomonas	4.49754	4.73575	2.96047	3.12646	3.3484	16.5671	16.7873
7	Bacteria;Proteobacteria;Gammaproteobacteria;Enterobacteriales;Enterobacteriaceae;Escherichia-Shigella	16.2572	4.39851	4.735	3.09934	3.5978	16.0078	15.334
8	Bacteria;Proteobacteria;Gammaproteobacteria;Pseudomonadales;Moraxellaceae;Acinetobacter	2.05461	4.49087	4.74371	2.97151	5.24273	15.594	15.9927
9	Bacteria;Proteobacteria;Alphaproteobacteria;Rickettsiales;Rickettsiaceae;Rickettsia	3.45969	4.17618	4.53371	2.83948	5.2506	16.6615	16.1472
10	Bacteria;Firmicutes;Bacilli;Lactobacillales;Enterococcaceae;Enterococcus	3.7522	3.94409	2.27416	2.71725	4.95581	16.4494	16.2733
