# Supplementary material for: Resistance of Tick Gut Microbiome to Anti-Tick Vaccines, Pathogen Infection and Antimicrobial Peptides
Source: Pathogens. 2020 Apr 22;9(4):309. doi: 10.3390/pathogens9040309 (PMC7238099; doi:10.3390/pathogens9040309)
Supplement: Supplementary file 1 [file pathogens-09-00309-s001.zip › Table S2.xlsx]

## Sheet: Planilha1
#	MetaCyc patway arragement		Percentile frequencies (Feature count; log)
	Metabolic Funtion	Pathway	0.02	0.09	0.25	0.5	0.75	0.91	0.98
1	aerobic respiration I (cytochrome c)	aerobic respiration I (cytochrome c)		4.55173	4.70282	4.97086	5.14344	5.21512	5.22862
2	Cell Wall Biosynthesis	peptidoglycan maturation (meso-diaminopimelate containing)		4.21707	4.35603	4.67133	4.93284	5.02033	5.10564
3	Fatty Acid Biosynthesis	gondoate biosynthesis (anaerobic)		4.43814	4.5046	4.88281	4.97054	5.02718	5.08687
4	Fatty Acid Biosynthesis	cis-vaccenate biosynthesis		4.41886	4.48777	4.74808	4.96529	5.01648	5.07252
5	Fermentation of Pyruvate	pyruvate fermentation to isobutanol (engineered)		4.43987	4.51566	4.71203	4.97801	5.0282	5.04344
6	pentose phosphate pathway (non-oxidative branch)	pentose phosphate pathway (non-oxidative branch)		4.40338	4.4487	4.56591	4.80733	4.90804	4.98863
7	Fatty Acid Biosynthesis	fatty acid elongation -- saturated		4.36982	4.47632	4.80246	4.91569	4.9722	5.01967
8	TCA cycle V (2-oxoglutarate:ferredoxin oxidoreductase)	TCA cycle V (2-oxoglutarate:ferredoxin oxidoreductase)		4.33274	4.41463	4.63339	4.90884	4.95216	5.00065
9	TCA cycle I (prokaryotic)	TCA cycle I (prokaryotic)		4.35166	4.45812	4.65787	4.93262	4.96558	5.00265
10	Fatty Acid Biosynthesis	mycolate biosynthesis		4.36019	4.42802	4.52273	4.81196	4.88353	4.9624
11	Fermentation to Alcohols	superpathway of (R,R)-butanediol biosynthesis		3.17828	3.35195	3.52919	4.6437	4.7943	4.91143
12	Sugar Biosynthesis	Calvin-Benson-Bassham cycle		4.30344	4.37476	4.54762	4.80502	4.88136	4.94016
13	Fatty Acid Degradation	fatty acid β-oxidation I		4.31895	4.44358	4.67243	4.75549	4.88636	4.96843
14	Fatty Acid Biosynthesis	oleate biosynthesis IV (anaerobic)		4.33857	4.40962	4.49914	4.76056	4.85781	4.94512
15	Sugar Derivative Degradation	anhydromuropeptides recycling I		3.93724	4.02178	4.31741	4.80243	4.8953	4.93893
16	TCA cycle VIII (Helicobacter)	TCA cycle VIII (helicobacter)		4.29443	4.42782	4.63686	4.86019	4.9188	4.95805
17	Fatty Acid Biosynthesis	palmitoleate biosynthesis I (from (5Z)-dodec-5-enoate)		4.30786	4.36034	4.48606	4.74997	4.84433	4.93659
18	TCA cycle IV (2-oxoglutarate decarboxylase)	TCA cycle IV (2-oxoglutarate decarboxylase)		4.30092	4.40579	4.619	4.89085	4.93951	4.96281
19	Fatty Acid Biosynthesis	stearate biosynthesis II (bacteria and plants)		4.30794	4.36273	4.48341	4.72204	4.85696	4.9424
20	Fatty Acid Biosynthesis	(5Z)-dodecenoate biosynthesis I		4.30441	4.35673	4.47723	4.7339	4.83277	4.92708
21	TCA cycle VII (acetate-producers)	TCA cycle VII (acetate-producers)		4.26716	4.41374	4.61247	4.84963	4.90824	4.94825
22	CO2 Fixation	incomplete reductive TCA cycle		3.57961	3.76852	3.98108	4.67497	4.80184	4.88837
23	Pyrimidine Nucleotide Biosynthesis	superpathway of pyrimidine nucleobases salvage		4.34838	4.42999	4.60302	4.87911	4.90695	4.93752
24	Sugar Derivative Degradation	myo-, chiro- and scyllo-inositol degradation		2.10076	2.38757	2.67029	3.71511	4.25002	4.67526
25	Phospholipid Biosynthesis	CDP-diacylglycerol biosynthesis II		4.40616	4.45909	4.64057	4.88747	4.91866	4.95041
26	Phospholipid Biosynthesis	CDP-diacylglycerol biosynthesis I		4.40616	4.45909	4.64057	4.88747	4.91866	4.95041
27	superpathway of L-serine and glycine biosynthesis I	superpathway of L-serine and glycine biosynthesis I		4.278	4.36272	4.54341	4.86159	4.89636	4.93695
28	Cell Wall Biosynthesis	UDP-N-acetylmuramoyl-pentapeptide biosynthesis II (lysine-containing)		4.19084	4.24195	4.306	4.84462	4.86952	4.91116
29	Proteinogenic Amino Acid Biosynthesis	L-isoleucine biosynthesis II		4.37163	4.44229	4.6539	4.74153	4.86272	4.90467
30	Purine Nucleotide Biosynthesis	superpathway of adenosine nucleotides de novo biosynthesis I		4.37631	4.41567	4.64626	4.84374	4.90447	4.92678
31	Phospholipid Biosynthesis	superpathway of phospholipid biosynthesis I (bacteria)		4.40231	4.44709	4.65433	4.87311	4.90511	4.92887
32	2'-Deoxyribonucleotide Biosynthesis	adenosine deoxyribonucleotides de novo biosynthesis II		4.3786	4.43968	4.65553	4.86478	4.90471	4.92894
33	2'-Deoxyribonucleotide Biosynthesis	guanosine deoxyribonucleotides de novo biosynthesis II		4.3786	4.43968	4.65553	4.86478	4.90471	4.92894
34	Sulfur Compound Metabolism	superpathway of sulfate assimilation and cysteine biosynthesis		3.9141	4.02587	4.13833	4.81676	4.88381	4.91293
35	superpathway of glyoxylate bypass and TCA	superpathway of glyoxylate bypass and TCA		4.24794	4.38251	4.60015	4.81843	4.87421	4.91036
36	Cell Wall Biosynthesis	UDP-N-acetylmuramoyl-pentapeptide biosynthesis I (meso-diaminopimelate containing)		4.30729	4.36584	4.56093	4.8343	4.86616	4.90851
37	Purine Nucleotide Degradation	inosine 5'-phosphate degradation		4.36453	4.43258	4.60363	4.72024	4.83713	4.90965
38	superpathway of aromatic amino acid biosynthesis	superpathway of aromatic amino acid biosynthesis		4.31916	4.40926	4.63653	4.80938	4.86928	4.89738
39	Proteinogenic Amino Acid Biosynthesis	L-valine biosynthesis		4.36972	4.4108	4.62003	4.82573	4.89003	4.90828
40	Proteinogenic Amino Acid Biosynthesis	L-isoleucine biosynthesis I (from threonine)		4.36972	4.4108	4.62003	4.82573	4.89003	4.90828
41	glycolysis II (from fructose 6-phosphate)	glycolysis II (from fructose 6-phosphate)		4.30191	4.34902	4.53944	4.79088	4.86974	4.91127
42	Proteinogenic Amino Acid Biosynthesis	L-tryptophan biosynthesis		4.29623	4.35432	4.58837	4.7951	4.88748	4.91191
43	Fatty Acid Biosynthesis	superpathway of fatty acid biosynthesis initiation (E. coli)		4.23583	4.31335	4.42667	4.72838	4.84226	4.87178
44	Fermentation of Pyruvate	pyruvate fermentation to propanoate I		3.11462	3.24235	3.49449	4.5125	4.70787	4.83906
45	Phospholipid Biosynthesis	phosphatidylglycerol biosynthesis II (non-plastidic)		4.38836	4.43168	4.63758	4.8591	4.8888	4.91216
46	Phospholipid Biosynthesis	phosphatidylglycerol biosynthesis I (plastidic)		4.38836	4.43168	4.63758	4.8591	4.8888	4.91216
47	Purine Nucleotide Biosynthesis	superpathway of adenosine nucleotides de novo biosynthesis II		4.36226	4.39938	4.62818	4.8309	4.88759	4.90981
48	Sulfur Compound Metabolism	assimilatory sulfate reduction I		3.71554	3.86994	4.01849	4.77909	4.86405	4.88489
49	Sugar Biosynthesis	gluconeogenesis I		4.26849	4.33845	4.54425	4.78339	4.83784	4.87886
50	Cell Wall Biosynthesis	peptidoglycan biosynthesis I (meso-diaminopimelate containing)		4.30273	4.35852	4.55572	4.82554	4.85443	4.89264
51	Proteinogenic Amino Acid Biosynthesis	L-lysine biosynthesis III		4.35089	4.39767	4.58597	4.82403	4.88095	4.89853
52	Purine Nucleotide Biosynthesis	adenosine ribonucleotides de novo biosynthesis		4.35941	4.3921	4.61048	4.82052	4.87861	4.90075
53	Cell Wall Biosynthesis	peptidoglycan biosynthesis III (mycobacteria)		4.28482	4.33477	4.54792	4.81838	4.84848	4.8782
54	Purine Nucleotide Biosynthesis	superpathway of 5-aminoimidazole ribonucleotide biosynthesis		4.28898	4.34094	4.54102	4.81101	4.84941	4.89181
55	Purine Nucleotide Biosynthesis	5-aminoimidazole ribonucleotide biosynthesis II		4.28898	4.34094	4.54102	4.81101	4.84941	4.89181
56	Purine Nucleotide Biosynthesis	superpathway of guanosine nucleotides de novo biosynthesis I		4.36364	4.40816	4.64447	4.83983	4.88493	4.89894
57	Superpathways	superpathway of branched amino acid biosynthesis		4.34037	4.39324	4.60549	4.73906	4.83822	4.87698
58	glycolysis III (from glucose)	glycolysis III (from glucose)		4.31694	4.37161	4.57441	4.76754	4.84775	4.88839
59	Purine Nucleotide Biosynthesis	5-aminoimidazole ribonucleotide biosynthesis I		4.30839	4.37084	4.5814	4.81546	4.86855	4.89157
60	Purine Nucleotide Biosynthesis	superpathway of purine nucleotides de novo biosynthesis I		4.31984	4.3733	4.60091	4.81129	4.86925	4.88948
61	Fatty Acid Biosynthesis	fatty acid salvage		4.15371	4.2603	4.39566	4.75359	4.83765	4.8787
62	Chorismate Biosynthesis	chorismate biosynthesis I		4.29264	4.38364	4.60383	4.77982	4.83787	4.86651
63	Proteinogenic Amino Acid Biosynthesis	superpathway of L-isoleucine biosynthesis I		4.34863	4.38625	4.61381	4.77062	4.8382	4.87006
64	Pyrimidine Nucleotide Biosynthesis	superpathway of pyrimidine ribonucleotides de novo biosynthesis		4.32928	4.37512	4.58962	4.81148	4.86477	4.88482
65	Proteinogenic Amino Acid Biosynthesis	L-arginine biosynthesis II (acetyl cycle)		4.03312	4.13442	4.23187	4.78128	4.83402	4.87472
66	Pyrimidine Nucleotide Biosynthesis	UMP biosynthesis I		4.29025	4.36515	4.57644	4.80378	4.86493	4.88119
67	Proteinogenic Amino Acid Biosynthesis	superpathway of L-threonine biosynthesis		4.34422	4.37838	4.60834	4.78053	4.83515	4.86264
68	Purine Nucleotide Biosynthesis	superpathway of guanosine nucleotides de novo biosynthesis II		4.28102	4.37897	4.62283	4.82316	4.87015	4.88817
69	Vitamin Biosynthesis	superpathway of tetrahydrofolate biosynthesis		4.29888	4.32277	4.35832	4.80821	4.8433	4.87008
70	2'-Deoxyribonucleotide Biosynthesis	pyrimidine deoxyribonucleotides de novo biosynthesis I		4.25832	4.35331	4.60162	4.80134	4.85417	4.87854
71	Porphyrin Compound Biosynthesis	heme b biosynthesis II (anaerobic)		4.17887	4.32606	4.56629	4.81578	4.85033	4.8736
72	Proteinogenic Amino Acid Biosynthesis	superpathway of L-phenylalanine biosynthesis		4.24529	4.34234	4.57214	4.65643	4.78572	4.8543
73	Nitrogen Compound Metabolism	urea cycle		3.86516	4.02423	4.12103	4.57947	4.72555	4.83821
74	superpathway of glycolysis, pyruvate dehydrogenase, TCA, and glyoxylate bypass	superpathway of glycolysis, pyruvate dehydrogenase, TCA, and glyoxylate bypass		4.2708	4.35035	4.57345	4.76652	4.83626	4.85256
75	Proteinogenic Amino Acid Biosynthesis	L-isoleucine biosynthesis III		4.31997	4.37775	4.60032	4.69576	4.80672	4.84963
76	2'-Deoxyribonucleotide Biosynthesis	superpathway of pyrimidine deoxyribonucleotides de novo biosynthesis		4.26121	4.35164	4.59452	4.70438	4.81864	4.84692
77	Chorismate Biosynthesis	chorismate biosynthesis from 3-dehydroquinate		4.27746	4.367	4.5847	4.77132	4.83105	4.85485
78	glyoxylate cycle	glyoxylate cycle		4.15987	4.29006	4.51049	4.72096	4.80853	4.83165
79	Vitamin Biosynthesis	phosphopantothenate biosynthesis I		4.24719	4.32407	4.53644	4.77081	4.84162	4.868
80	Vitamin Biosynthesis	superpathway of tetrahydrofolate biosynthesis and salvage		4.31404	4.36255	4.43089	4.81972	4.84902	4.86891
81	Fermentation of Pyruvate	mixed acid fermentation		4.23499	4.34467	4.51395	4.62576	4.72839	4.82438
82	Proteinogenic Amino Acid Biosynthesis	superpathway of L-methionine biosynthesis (transsulfuration)		4.1159	4.17556	4.24567	4.68864	4.76203	4.81957
83	Proteinogenic Amino Acid Biosynthesis	L-arginine biosynthesis I (via L-ornithine)		4.16596	4.2351	4.30069	4.7624	4.82287	4.85351
84	Proteinogenic Amino Acid Biosynthesis	superpathway of L-methionine biosynthesis (by sulfhydrylation)		4.01799	4.11546	4.19721	4.72416	4.81358	4.84457
85	Proteinogenic Amino Acid Biosynthesis	L-arginine biosynthesis IV (archaebacteria)		4.17059	4.23554	4.30294	4.7605	4.82075	4.85155
86	Proteinogenic Amino Acid Biosynthesis	S-adenosyl-L-methionine cycle I		3.8048	3.86664	4.03243	4.74526	4.81517	4.8531
87	Vitamin Biosynthesis	6-hydroxymethyl-dihydropterin diphosphate biosynthesis III (Chlamydia)		4.31226	4.38551	4.64688	4.77947	4.84291	4.86274
88	partial TCA cycle (obligate autotrophs)	partial TCA cycle (obligate autotrophs)		4.20431	4.28582	4.55802	4.71508	4.77002	4.82505
89	Proteinogenic Amino Acid Biosynthesis	L-lysine biosynthesis I		4.25562	4.34313	4.55689	4.61956	4.79148	4.83294
90	Pyrimidine Nucleotide Biosynthesis	pyrimidine deoxyribonucleosides salvage		3.63042	3.76332	3.99419	4.62538	4.73608	4.80758
91	Proteinogenic Amino Acid Biosynthesis	superpathway of L-alanine biosynthesis		4.30824	4.34537	4.47392	4.55975	4.76861	4.84279
92	Purine Nucleotide Biosynthesis	guanosine ribonucleotides de novo biosynthesis		4.31657	4.37447	4.60628	4.80621	4.85298	4.86757
93	Proteinogenic Amino Acid Biosynthesis	L-methionine biosynthesis III		4.23855	4.33001	4.63932	4.71326	4.79849	4.84534
94	Sugar Biosynthesis	UDP-N-acetyl-D-glucosamine biosynthesis I		4.18492	4.3205	4.55132	4.77512	4.82235	4.84958
95	tRNA charging	tRNA charging		4.3071	4.35717	4.57047	4.79928	4.83487	4.85412
96	Proteinogenic Amino Acid Biosynthesis	L-arginine biosynthesis III (via N-acetyl-L-citrulline)		4.15971	4.25826	4.45261	4.55855	4.74681	4.82068
97	Proteinogenic Amino Acid Biosynthesis	L-lysine biosynthesis VI		4.27148	4.3519	4.57199	4.64787	4.78752	4.83399
98	glycolysis I (from glucose 6-phosphate)	glycolysis I (from glucose 6-phosphate)		4.30482	4.35169	4.54246	4.72459	4.80494	4.84247
99	Other Amino Acid Biosynthesis	L-ornithine biosynthesis I		4.24383	4.31755	4.53009	4.72173	4.79696	4.82659
100	Purine Nucleotide Degradation	adenosine nucleotides degradation II		3.97167	4.0713	4.26222	4.51097	4.69758	4.77292
101	Proteinogenic Amino Acid Biosynthesis	superpathway of L-tyrosine biosynthesis		4.2346	4.33409	4.56825	4.65193	4.76532	4.81162
102	Porphyrin Compound Biosynthesis	heme b biosynthesis I (aerobic)		4.09128	4.22167	4.49933	4.67701	4.7711	4.81139
103	Purine Nucleotide Biosynthesis	inosine-5'-phosphate biosynthesis I		4.26336	4.30761	4.53005	4.76923	4.8135	4.84106
104	2'-Deoxyribonucleotide Biosynthesis	superpathway of pyrimidine deoxyribonucleotides de novo biosynthesis (E. coli)		4.23074	4.31266	4.55752	4.7646	4.81641	4.83805
105	Purine Nucleotide Biosynthesis	inosine-5'-phosphate biosynthesis III		4.18444	4.29436	4.52629	4.76433	4.81004	4.83422
106	8-Amino-7-oxononanoate Biosynthesis	8-amino-7-oxononanoate biosynthesis I		4.2038	4.269	4.38641	4.6155	4.71427	4.77123
107	Pyrimidine Nucleotide Biosynthesis	superpathway of pyrimidine ribonucleosides salvage		3.93056	4.08295	4.24589	4.70962	4.77466	4.81986
108	Coenzyme A Biosynthesis	superpathway of coenzyme A biosynthesis I (bacteria)		4.25709	4.29934	4.53377	4.74569	4.81223	4.83902
109	Vitamin Biosynthesis	biotin biosynthesis I		4.19044	4.28727	4.43365	4.60037	4.6874	4.78
110	Tetrapyrrole Biosynthesis	tetrapyrrole biosynthesis I (from glutamate)		4.11122	4.2705	4.51511	4.76376	4.8097	4.83056
111	Superpathways	superpathway of S-adenosyl-L-methionine biosynthesis		4.2274	4.32794	4.59279	4.71771	4.77958	4.81745
112	Vitamin Biosynthesis	flavin biosynthesis I (bacteria and plants)		4.25229	4.3155	4.53667	4.73375	4.80652	4.82762
113	pentose phosphate pathway	pentose phosphate pathway		4.25593	4.31732	4.50581	4.56324	4.68417	4.78756
114	Vitamin Biosynthesis	6-hydroxymethyl-dihydropterin diphosphate biosynthesis I		4.31195	4.36175	4.59807	4.75727	4.81068	4.82907
115	Proteinogenic Amino Acid Biosynthesis	L-histidine biosynthesis		4.25816	4.30965	4.56088	4.71617	4.79078	4.83571
116	queuosine biosynthesis	queuosine biosynthesis		4.24845	4.28346	4.5305	4.71861	4.78718	4.81861
117	Purine Nucleotide Degradation	guanosine nucleotides degradation III		3.82571	3.94699	4.19673	4.63409	4.71519	4.77128
118	superpathway of L-lysine, L-threonine and L-methionine biosynthesis I	superpathway of L-lysine, L-threonine and L-methionine biosynthesis I		4.21647	4.29499	4.36788	4.64856	4.73328	4.7871
119	Coenzyme A Biosynthesis	superpathway of coenzyme A biosynthesis I (bacteria)		4.27447	4.30507	4.53046	4.75261	4.80805	4.82847
120	Purine Nucleotide Degradation	purine nucleotides degradation II (aerobic)		3.87355	3.98564	4.17718	4.59835	4.68568	4.73949
121	Fermentation to Short-Chain Fatty Acids	homolactic fermentation		4.25711	4.33589	4.55456	4.68146	4.76361	4.79745
122	Pyrimidine Nucleotide Biosynthesis	pyrimidine deoxyribonucleotide phosphorylation		4.26719	4.33468	4.53518	4.76646	4.80086	4.82269
123	Purine Nucleotide Biosynthesis	superpathway of purine nucleotides de novo biosynthesis II		4.02131	4.21288	4.2979	4.66383	4.74905	4.78404
124	Pyrimidine Nucleotide Biosynthesis	superpathway of pyrimidine deoxyribonucleoside salvage		4.06294	4.15193	4.23239	4.68529	4.75087	4.79353
125	Purine Nucleotide Biosynthesis	adenine and adenosine salvage III		3.69203	3.80121	4.03942	4.61098	4.70325	4.78024
126	Superpathways	aspartate superpathway		4.19786	4.26057	4.30845	4.64653	4.73205	4.77513
127	Vitamin Biosynthesis	N10-formyl-tetrahydrofolate biosynthesis		4.29308	4.34494	4.60065	4.72676	4.79361	4.81377
128	Superpathways	superpathway of histidine, purine, and pyrimidine biosynthesis		3.97483	4.1285	4.21917	4.63976	4.72479	4.76068
129	Tetrapyrrole Biosynthesis	tetrapyrrole biosynthesis II (from glycine)		4.07956	4.25795	4.50562	4.73833	4.79442	4.81715
130	ppGpp biosynthesis	ppGpp biosynthesis		4.02772	4.12738	4.23684	4.49905	4.63512	4.76325
131	Vitamin Biosynthesis	thiamine salvage II		4.05507	4.26468	4.50357	4.67712	4.7548	4.80429
132	Sugar Degradation	glucose and glucose-1-phosphate degradation		3.85281	3.97742	4.12244	4.3981	4.65291	4.79596
133	Terpenoid Biosynthesis	methylerythritol phosphate pathway II		4.25045	4.28733	4.52698	4.69493	4.77037	4.79903
134	Terpenoid Biosynthesis	methylerythritol phosphate pathway I		4.25045	4.28733	4.52698	4.69493	4.77037	4.79903
135	preQ0 biosynthesis	preQ0 biosynthesis		4.17283	4.26559	4.51961	4.70597	4.76974	4.80336
136	Polyprenyl Biosynthesis	polyisoprenoid biosynthesis (E. coli)		4.20434	4.28458	4.52034	4.58019	4.7234	4.76606
137	Proteinogenic Amino Acid Biosynthesis	L-methionine biosynthesis I		4.06955	4.24047	4.52945	4.60732	4.71004	4.75946
138	Porphyrin Compound Biosynthesis	superpathay of heme b biosynthesis from glutamate		4.07904	4.24367	4.50811	4.69541	4.75207	4.77241
139	NAD Metabolism	NAD de novo biosynthesis I (from aspartate)		3.96406	4.04463	4.13224	4.63677	4.7241	4.76925
140	Polyprenyl Biosynthesis	superpathway of geranylgeranyl diphosphate biosynthesis II (via MEP)		4.06534	4.16283	4.23944	4.68892	4.74244	4.78352
141	Pyrimidine Nucleotide Degradation	superpathway of pyrimidine deoxyribonucleosides degradation		3.33755	3.48883	3.78853	4.50397	4.6367	4.71919
142	Quinol and Quinone Biosynthesis	ubiquinol-10 biosynthesis (prokaryotic)		4.15507	4.22176	4.32771	4.57328	4.64672	4.72691
143	Quinol and Quinone Biosynthesis	ubiquinol-7 biosynthesis (prokaryotic)		4.15507	4.22176	4.32771	4.57328	4.64672	4.72691
144	Quinol and Quinone Biosynthesis	ubiquinol-8 biosynthesis (prokaryotic)		4.15507	4.22176	4.32771	4.57328	4.64672	4.72691
145	Quinol and Quinone Biosynthesis	ubiquinol-9 biosynthesis (prokaryotic)		4.15507	4.22176	4.32771	4.57328	4.64672	4.72691
146	Cell Wall Biosynthesis	peptidoglycan biosynthesis IV (Enterococcus faecium)		2.96316	3.04785	3.48068	4.58527	4.72542	4.76717
147	Quinol and Quinone Biosynthesis	superpathway of ubiquinol-8 biosynthesis (prokaryotic)		4.11605	4.17208	4.25735	4.33894	4.60071	4.70367
148	Proteinogenic Amino Acid Degradation	L-histidine degradation I		3.78451	4.1681	4.50917	4.59459	4.66399	4.72985
149	superpathway of glycolysis and the Entner-Doudoroff pathway	superpathway of glycolysis and the Entner-Doudoroff pathway		4.2418	4.30265	4.48113	4.54981	4.62503	4.72904
150	Quinol and Quinone Biosynthesis	superpathway of menaquinol-7 biosynthesis		3.36635	3.48179	3.78347	4.45114	4.60147	4.71679
151	Sugar Biosynthesis	GDP-mannose biosynthesis		4.23311	4.30768	4.47739	4.58537	4.63091	4.68965
152	Fatty Acid Biosynthesis	palmitate biosynthesis II (bacteria and plants)		3.65147	3.80306	4.07555	4.48106	4.65077	4.73142
153	Quinol and Quinone Biosynthesis	superpathway of menaquinol-11 biosynthesis		3.34315	3.45241	3.78215	4.43992	4.59134	4.70705
154	Quinol and Quinone Biosynthesis	superpathway of menaquinol-12 biosynthesis		3.34315	3.45241	3.78215	4.43992	4.59134	4.70705
155	Quinol and Quinone Biosynthesis	superpathway of menaquinol-13 biosynthesis		3.34315	3.45241	3.78215	4.43992	4.59134	4.70705
156	superpathway of L-aspartate and L-asparagine biosynthesis	superpathway of L-aspartate and L-asparagine biosynthesis		3.75015	3.83867	4.01831	4.56577	4.658	4.72279
157	NAD Metabolism	NAD salvage pathway III (to nicotinamide riboside)		3.76392	3.83874	4.01077	4.4427	4.57746	4.67199
158	4-Aminobutanoate Degradation	4-aminobutanoate degradation V		3.72325	3.80391	3.95548	4.5031	4.61631	4.70182
159	Proteinogenic Amino Acid Degradation	L-arginine degradation (Stickland reaction)		3.34987	3.43928	3.60801	4.37468	4.56307	4.66964
160	2'-Deoxyribonucleotide Biosynthesis	pyrimidine deoxyribonucleotides de novo biosynthesis II		3.96083	4.14866	4.22575	4.55514	4.64206	4.70636
161	Fermentation to Acetate	acetylene degradation		3.64944	3.78055	4.07648	4.28571	4.46514	4.64064
162	Purine Nucleotide Degradation	purine ribonucleosides degradation		3.14726	3.25021	3.75458	4.50952	4.61777	4.69377
163	Vitamin Biosynthesis	superpathway of adenosylcobalamin salvage from cobinamide I		3.76072	3.83035	4.00834	4.35399	4.56025	4.67248
164	Vitamin Biosynthesis	superpathway of adenosylcobalamin salvage from cobinamide II		3.66532	3.75604	3.92051	4.34672	4.54845	4.65928
165	tRNA processing	tRNA processing		3.66849	3.76588	4.12757	4.45697	4.60314	4.69252
166	Vitamin Biosynthesis	adenosylcobalamin biosynthesis from adenosylcobinamide-GDP I		3.6214	3.73318	3.90284	4.34326	4.54618	4.65669
167	Sugar Degradation	superpathway of glucose and xylose degradation		3.39256	3.53432	3.76852	4.1832	4.48767	4.67977
168	Quinol and Quinone Biosynthesis	superpathway of phylloquinol biosynthesis		3.04724	3.16257	3.61372	4.33718	4.53087	4.65258
169	Sugar Biosynthesis	O-antigen building blocks biosynthesis (E. coli)		4.0138	4.19159	4.48398	4.56441	4.62068	4.6901
170	Porphyrin Compound Biosynthesis	superpathway of b heme biosynthesis from glycine		3.16621	3.29563	3.78072	4.51434	4.66335	4.69801
171	Quinol and Quinone Biosynthesis	2-carboxy-1,4-naphthoquinol biosynthesis		3.00095	3.11801	3.59807	4.31619	4.51897	4.64487
172	Porphyrin Compound Biosynthesis	superpathway of heme b biosynthesis from uroporphyrinogen-III		3.0106	3.21719	3.77505	4.47657	4.65631	4.69908
173	Sugar Degradation	sucrose degradation III (sucrose invertase)		4.10754	4.19742	4.33025	4.48667	4.60713	4.64776
174	Vitamin Biosynthesis	superpathway of pyridoxal 5'-phosphate biosynthesis and salvage		4.03481	4.14308	4.22593	4.34324	4.57571	4.65442
175	Terpenoid Biosynthesis	taxadiene biosynthesis (engineered)		3.8117	3.91201	4.07454	4.56208	4.6555	4.68857
176	Vitamin Biosynthesis	pyridoxal 5'-phosphate biosynthesis I		3.85223	3.91012	4.07858	4.19239	4.46995	4.63105
177	Polysaccharide Degradation	glycogen degradation I		4.04204	4.12398	4.18836	4.26816	4.44174	4.60031
178	Sulfur Compound Metabolism	superpathway of sulfur oxidation (Acidianus ambivalens)		2.73148	2.86755	3.04062	4.19896	4.43081	4.58697
179	2'-Deoxyribonucleotide Biosynthesis	pyrimidine deoxyribonucleotides de novo biosynthesis III		3.53321	3.74811	4.05936	4.34769	4.46842	4.54463
180	Sugar Degradation	sucrose degradation IV (sucrose phosphorylase)		3.89509	4.03261	4.15081	4.41379	4.58451	4.61168
181	NAD Metabolism	NAD salvage pathway I (PNC VI cycle)		4.15436	4.21344	4.29999	4.49477	4.56528	4.65151
182	superpathway of arginine and polyamine biosynthesis	superpathway of arginine and polyamine biosynthesis		3.89543	3.98809	4.07529	4.32162	4.47781	4.57976
183	Sugar Biosynthesis	dTDP-L-rhamnose biosynthesis		4.12625	4.21183	4.46182	4.51831	4.56335	4.63117
184	Polysaccharide Degradation	starch degradation V		4.02546	4.10984	4.18237	4.27532	4.43861	4.60325
185	Cell Wall Biosynthesis	peptidoglycan biosynthesis V (β-lactam resistance)		2.4947	2.70813	3.06405	4.48294	4.59877	4.66039
186	Sugar Acid Degradation	D-fructuronate degradation		3.49573	3.56303	3.86601	4.06197	4.31231	4.56915
187	Sugar Biosynthesis	CMP-3-deoxy-D-manno-octulosonate biosynthesis		4.0459	4.1229	4.1884	4.47475	4.5441	4.63175
188	Lipopolysaccharide Biosynthesis	Kdo transfer to lipid IVA III (Chlamydia)		4.00683	4.08533	4.1769	4.46474	4.53845	4.63076
189	Lipopolysaccharide Biosynthesis	lipid IVA biosynthesis		4.00987	4.09451	4.21986	4.46953	4.54522	4.63298
190	Proteinogenic Amino Acid Degradation	L-leucine degradation I		3.82155	3.9923	4.12417	4.39948	4.53795	4.58513
191	superpathway of purine deoxyribonucleosides degradation	superpathway of purine deoxyribonucleosides degradation		3.56302	3.6134	3.87749	4.42666	4.51826	4.59247
192	Sugar Derivative Degradation	superpathway of hexitol degradation (bacteria)		3.27579	3.43034	3.90471	4.19438	4.4728	4.59674
193	CO2 Fixation	reductive TCA cycle I		3.28819	3.53478	4.01119	4.24447	4.50432	4.61457
194	octane oxidation	octane oxidation		3.40103	3.60418	3.72425	3.92444	4.25357	4.48642
195	Quinol and Quinone Biosynthesis	superpathway of menaquinol-8 biosynthesis I		3.38031	3.49128	3.80625	4.44042	4.56769	4.64286
196	Sugar Biosynthesis	superpathway of UDP-glucose-derived O-antigen building blocks biosynthesis		3.86956	4.01341	4.13203	4.42659	4.58659	4.62369
197	Glycan Biosynthesis	glycogen biosynthesis I (from ADP-D-Glucose)		4.0536	4.14745	4.24797	4.41251	4.56599	4.62066
198	Lipopolysaccharide Biosynthesis	superpathway of (Kdo)2-lipid A biosynthesis		3.26073	3.41652	3.5228	3.8957	4.27834	4.5446
199	Sugar Degradation	D-galactose degradation I (Leloir pathway)		3.4348	3.51848	3.83302	4.13527	4.36519	4.55077
200	Sugar Acid Degradation	ketogluconate metabolism		2.70251	2.89701	3.2897	3.53558	4.01525	4.35234
201	Proteinogenic Amino Acid Degradation	L-histidine degradation II		3.11471	3.40894	3.56733	4.02614	4.25223	4.37468
202	Proteinogenic Amino Acid Degradation	superpathway of L-arginine, putrescine, and 4-aminobutanoate degradation		3.2128	3.31007	3.44866	3.68822	4.03413	4.36057
203	Proteinogenic Amino Acid Degradation	superpathway of L-arginine and L-ornithine degradation		3.2128	3.31007	3.44866	3.68822	4.03413	4.36057
204	Sugar Derivative Degradation	myo-inositol degradation I		1.87183	2.15018	2.4205	3.52087	4.03963	4.37926
205	Proteinogenic Amino Acid Biosynthesis	L-isoleucine biosynthesis IV		3.93886	4.07296	4.16509	4.28768	4.48538	4.5823
206	Quinol and Quinone Biosynthesis	superpathway of demethylmenaquinol-8 biosynthesis I		3.21433	3.32901	3.67305	4.34548	4.4992	4.57737
207	superpathway of polyamine biosynthesis I	superpathway of polyamine biosynthesis I		3.72716	3.84175	3.94018	4.15197	4.29463	4.44495
208	Sugar Derivative Degradation	superpathway of β-D-glucuronosides degradation		3.01803	3.14765	3.54101	3.76321	4.04768	4.38867
209	Phosphorus Compound Metabolism	methylphosphonate degradation I		2.8441	2.90886	3.45843	3.6747	3.9556	4.29652
210	Fermentation to Acetate	pyruvate fermentation to acetate and lactate II		3.28874	3.50003	3.74246	4.14883	4.40545	4.53745
211	Sugar Derivative Degradation	4-deoxy-L-threo-hex-4-enopyranuronate degradation		3.32937	3.47176	3.67643	3.91251	4.14229	4.34347
212	Propanoate Degradation	2-methylcitrate cycle II		3.84655	3.9624	4.05219	4.31273	4.4691	4.51863
213	Proteinogenic Amino Acid Degradation	L-tyrosine degradation I		3.69549	3.80335	3.92031	4.06747	4.37887	4.51695
214	Sugar Acid Degradation	D-galacturonate degradation I		3.19933	3.34232	3.59161	3.80621	4.11099	4.36694
215	Sugar Biosynthesis	dTDP-N-acetylthomosamine biosynthesis		2.86067	2.98824	3.24577	3.60204	4.01902	4.35001
216	Superpathways	superpathway of hexuronide and hexuronate degradation		3.00294	3.12696	3.45892	3.67362	3.96312	4.31719
217	Sugar Biosynthesis	ADP-L-glycero-β-D-manno-heptose biosynthesis		3.29639	3.40501	3.47728	3.69784	4.06294	4.35209
218	Lipopolysaccharide Biosynthesis	enterobacterial common antigen biosynthesis		2.64844	2.73759	2.86189	3.32656	3.90922	4.28801
219	Superpathways	superpathway of chorismate metabolism		3.45425	3.55781	3.95803	4.1428	4.42254	4.51221
220	superpathway of ornithine degradation	superpathway of ornithine degradation		3.02958	3.1677	3.40829	3.64174	3.99393	4.31416
221	Vitamin Biosynthesis	superpathway of thiamine diphosphate biosynthesis II		3.52367	3.67359	4.02719	4.25108	4.37115	4.45553
222	Cell Wall Biosynthesis	peptidoglycan biosynthesis II (staphylococci)		2.41739	2.6011	2.97366	4.22885	4.40455	4.46756
223	Propanoate Degradation	2-methylcitrate cycle I		3.8632	4.00691	4.08289	4.26625	4.40567	4.50024
224	Sugar Biosynthesis	superpathway of GDP-mannose-derived O-antigen building blocks biosynthesis		3.53691	3.78064	4.06832	4.32331	4.42341	4.46823
225	NAD Metabolism	NAD de novo biosynthesis II (from tryptophan)		3.06479	3.21513	3.44422	3.72518	4.32949	4.49282
226	Vitamin Biosynthesis	superpathway of thiamine diphosphate biosynthesis I		3.95901	4.1342	4.24669	4.31143	4.39168	4.48285
227	Proteinogenic Amino Acid Degradation	L-arginine degradation II (AST pathway)		3.08819	3.2935	3.4607	3.62055	4.02843	4.33478
228	Sugar Degradation	lactose and galactose degradation I		1.98671	2.14499	2.49031	3.93413	4.29365	4.44904
229	Fermentation to Alcohols	superpathway of 2,3-butanediol biosynthesis		3.16025	3.31315	3.51786	4.07697	4.2778	4.42253
230	Quinol and Quinone Biosynthesis	superpathway of menaquinol-6 biosynthesis I		3.27172	3.37503	3.72651	4.05431	4.37294	4.47422
231	Quinol and Quinone Biosynthesis	superpathway of menaquinol-10 biosynthesis		3.27172	3.37503	3.72651	4.05431	4.37294	4.47422
232	Quinol and Quinone Biosynthesis	superpathway of menaquinol-9 biosynthesis		3.27172	3.37503	3.72651	4.05431	4.37294	4.47422
233	Sugar Acid Degradation	D-glucarate degradation I		2.63722	2.75603	2.9763	3.36532	3.90051	4.24979
234	Proteinogenic Amino Acid Degradation	L-tryptophan degradation to 2-amino-3-carboxymuconate semialdehyde		2.86567	3.0225	3.2551	3.54223	4.29389	4.47769
235	Superpathways	superpathway of D-glucarate and D-galactarate degradation		2.63318	2.74712	2.97546	3.3516	3.89921	4.234
236	Sugar Acid Degradation	D-galactarate degradation I		2.63318	2.74712	2.97546	3.3516	3.89921	4.234
237	Lipopolysaccharide Biosynthesis	polymyxin resistance		2.49445	2.60527	2.7742	3.24051	3.8471	4.27006
238	Sugar Degradation	L-rhamnose degradation I		2.73579	2.78882	3.11913	3.45247	3.84912	4.2154
239	Formaldehyde Assimilation	formaldehyde assimilation II (assimilatory RuMP Cycle)		2.22359	2.40213	2.814	3.97691	4.20004	4.38893
240	Proteinogenic Amino Acid Biosynthesis	L-glutamate and L-glutamine biosynthesis		3.06645	3.25115	3.56064	3.99225	4.14313	4.29796
241	Proteinogenic Amino Acid Biosynthesis	L-lysine biosynthesis II		2.33713	2.54376	2.86615	3.99661	4.22359	4.3886
242	colanic acid building blocks biosynthesis	colanic acid building blocks biosynthesis		3.73831	3.9529	4.06493	4.1819	4.28332	4.35318
243	Fermentation to Acetate	hexitol fermentation to lactate, formate, ethanol and acetate		2.96873	3.12101	3.46847	3.80449	4.09254	4.30396
244	Quinol and Quinone Biosynthesis	superpathway of demethylmenaquinol-6 biosynthesis I		3.10348	3.20955	3.58166	3.93338	4.2548	4.37035
245	Quinol and Quinone Biosynthesis	superpathway of demethylmenaquinol-9 biosynthesis		3.10348	3.20955	3.58166	3.93338	4.2548	4.37035
246	cob(II)yrinate a,c-diamide biosynthesis	cob(II)yrinate a,c-diamide biosynthesis II (late cobalt incorporation)		3.16344	3.30384	3.47488	4.07732	4.23877	4.32349
247	norspermidine biosynthesis	norspermidine biosynthesis		2.70915	2.95074	3.11922	3.46235	4.15897	4.32719
248	Siderophore Biosynthesis	enterobactin biosynthesis		3.47203	3.59906	3.77745	3.97682	4.11318	4.21082
249	Purine Nucleotide Degradation	purine nucleobases degradation I (anaerobic)		2.15525	2.43545	2.74412	3.67134	4.07531	4.21266
250	Formaldehyde Oxidation	formaldehyde oxidation I		2.09909	2.27779	2.69067	3.83981	4.03249	4.19593
251	Cell Wall Biosynthesis	poly(glycerol phosphate) wall teichoic acid biosynthesis		2.38367	2.54736	2.89297	3.80553	4.06005	4.27228
252	Allantoin Degradation	allantoin degradation to glyoxylate III		3.14185	3.23999	3.66889	3.96171	4.12524	4.24861
253	superpathway of N-acetylneuraminate degradation	superpathway of N-acetylneuraminate degradation		3.25069	3.33906	3.71676	3.99242	4.14768	4.25407
254	Polyprenyl Biosynthesis	superpathway of geranylgeranyldiphosphate biosynthesis I (via mevalonate)		2.44767	2.56206	2.86093	3.73248	4.00808	4.20676
255	Proteinogenic Amino Acid Biosynthesis	superpathway of L-tryptophan biosynthesis		2.81689	3.01065	3.2868	3.57161	3.97254	4.1492
256	Vitamin Biosynthesis	thiazole biosynthesis I (facultative anaerobic bacteria)		3.35241	3.68113	3.83552	4.0045	4.10412	4.22932
257	Vitamin Biosynthesis	thiazole biosynthesis II (aerobic bacteria)		2.84282	3.02332	3.56092	3.85866	3.96906	4.13785
258	Allantoin Degradation	allantoin degradation IV (anaerobic)		2.83653	2.93567	3.41778	3.73037	4.0506	4.19701
259	photorespiration	photorespiration		2.03517	2.41577	3.2318	3.9008	4.05169	4.18491
260	Vitamin Biosynthesis	biotin biosynthesis II		1.61239	2.0152	2.39389	3.78029	4.01819	4.17367
261	Protocatechuate Degradation	protocatechuate degradation II (ortho-cleavage pathway)		3.36378	3.50982	3.72563	3.95663	4.06326	4.13405
262	Sugar Degradation	Bifidobacterium shunt		1.87756	2.30722	3.17252	3.68806	3.88154	4.09112
263	aromatic biogenic amine degradation (bacteria)	aromatic biogenic amine degradation (bacteria)		3.15205	3.35839	3.57459	3.74482	3.92713	4.06267
264	superpathway of polyamine biosynthesis II	superpathway of polyamine biosynthesis II		3.60371	3.66788	3.80339	3.89917	3.99142	4.09991
265	Fermentation of Pyruvate	heterolactic fermentation		1.8207	2.25358	3.07561	3.62947	3.83468	4.04708
266	Terpenoid Biosynthesis	mevalonate pathway I		2.29615	2.41251	2.71529	3.59359	3.87313	4.09453
267	Polyprenyl Biosynthesis	mono-trans, poly-cis decaprenyl phosphate biosynthesis		2.127	2.33953	2.76157	3.73992	3.90405	4.05454
268	Toluene Degradation	toluene degradation II (aerobic) (via 4-methylcatechol)		3.26843	3.40008	3.51418	3.70457	3.83116	4.03758
269	Toluene Degradation	toluene degradation I (aerobic) (via o-cresol)		3.26843	3.40008	3.51418	3.70457	3.83116	4.03758
270	Fermentation of Pyruvate	superpathway of Clostridium acetobutylicum acidogenic fermentation		2.02847	2.28645	2.54757	3.27259	3.44662	3.79995
271	Fermentation to Short-Chain Fatty Acids	acetyl-CoA fermentation to butanoate II		3.41573	3.48817	3.60287	3.7385	3.85146	3.93086
272	Catechol Degradation	catechol degradation to β-ketoadipate		3.13476	3.25649	3.42068	3.59753	3.72306	3.83087
273	Phenolic Compound Degradation	phenylacetate degradation I (aerobic)		3.18145	3.34712	3.48481	3.62351	3.73085	3.89692
274	Fermentation of Pyruvate	pyruvate fermentation to acetone		2.89577	3.03845	3.21298	3.39422	3.57831	3.82747
275	Catechol Degradation	aromatic compounds degradation via β-ketoadipate		3.18219	3.27007	3.42927	3.586	3.69341	3.80803
276	Catechol Degradation	catechol degradation III (ortho-cleavage pathway)		3.18219	3.27007	3.42927	3.586	3.69341	3.80803
277	4-hydroxyphenylacetate degradation	4-hydroxyphenylacetate degradation		2.81415	3.16673	3.36372	3.69491	3.83751	3.98153
278	Fermentation of Pyruvate	pyruvate fermentation to butanoate		1.92149	2.18139	2.4421	3.16699	3.34395	3.71199
279	Catechol Degradation	catechol degradation I (meta-cleavage pathway)		2.68959	2.80581	3.18964	3.51415	3.67056	3.74644
280	superpathway of phenylethylamine degradation	superpathway of phenylethylamine degradation		3.01478	3.19199	3.30559	3.42071	3.61742	3.86391
281	phospholipases	phospholipases		1.96929	2.6128	2.95878	3.34994	3.64436	3.87242
282	Fermentation to Alcohols	glycerol degradation to butanol		2.6279	2.82336	3.09565	3.61962	3.7979	3.8903
283	superpathway of N-acetylglucosamine, N-acetylmannosamine and N-acetylneuraminate degradation	superpathway of N-acetylglucosamine, N-acetylmannosamine and N-acetylneuraminate degradation		2.77863	2.88565	3.31247	3.5888	3.77351	3.90728
284	superpathway of methylglyoxal degradation	superpathway of methylglyoxal degradation		2.88594	3.01772	3.24037	3.42127	3.60003	3.80827
285	methyl ketone biosynthesis (engineered)	methyl ketone biosynthesis (engineered)		2.11632	2.33312	2.69473	3.48036	3.69833	3.81612
286	3-phenylpropanoate and 3-(3-hydroxyphenyl)propanoate degradation	3-phenylpropanoate and 3-(3-hydroxyphenyl)propanoate degradation		2.75569	2.97091	3.11934	3.30808	3.50126	3.70177
287	methanol oxidation to carbon dioxide	methanol oxidation to carbon dioxide		2.29872	2.48882	2.74755	3.5201	3.73222	3.81
288	Toluene Degradation	toluene degradation III (aerobic) (via p-cresol)		3.24694	3.32757	3.47268	3.59104	3.73573	3.83348
289	cob(II)yrinate a,c-diamide biosynthesis	cob(II)yrinate a,c-diamide biosynthesis I (early cobalt insertion)		1.97409	2.49573	2.75579	3.36419	3.5766	3.77806
290	Toluene Degradation	toluene degradation IV (aerobic) (via catechol)		2.34111	2.46009	2.66958	3.24927	3.47685	3.64635
291	Reductant Biosynthesis	mycothiol biosynthesis		1.82413	2.06599	2.49136	3.46592	3.63772	3.82883
292	superpathway of salicylate degradation	superpathway of salicylate degradation		3.16787	3.25956	3.42337	3.58826	3.68666	3.76981
293	4-methylcatechol degradation (ortho cleavage)	4-methylcatechol degradation (ortho cleavage)		3.10373	3.24008	3.37282	3.48009	3.60924	3.72507
294	Phenolic Compound Degradation	3-phenylpropanoate and 3-(3-hydroxyphenyl)propanoate degradation to 2-hydroxypentadienoate		2.27361	2.47978	2.75958	2.92387	3.23869	3.54053
295	Phenolic Compound Degradation	cinnamate and 3-hydroxycinnamate degradation to 2-hydroxypentadienoate		2.27361	2.47978	2.75958	2.92387	3.23869	3.54053
296	Glycine Betaine Degradation	glycine betaine degradation I		1.90565	2.08677	2.3554	3.1903	3.40543	3.63741
297	methylgallate degradation	methylgallate degradation		1.63744	1.89793	2.22726	3.41031	3.58857	3.65397
298	Cell Wall Biosynthesis	mycolyl-arabinogalactan-peptidoglycan complex biosynthesis		1.50292	1.65939	2.0516	3.27883	3.48733	3.67008
299	superpathway of glycol metabolism and degradation	superpathway of glycol metabolism and degradation		2.38977	2.65055	2.78265	3.02198	3.31283	3.56084
300	methylaspartate cycle	methylaspartate cycle		1.35009	2.23348	2.81977	3.2277	3.41592	3.62604
301	Phenolic Compound Degradation	3-phenylpropanoate degradation		2.46112	2.6015	2.90394	3.45719	3.6228	3.7133
302	Gallate Degradation	gallate degradation II		1.54103	1.80185	2.13152	3.31845	3.49706	3.56424
303	Sugar Degradation	fucose degradation		2.25587	2.58311	2.7215	2.9275	3.23	3.49215
304	Superpathways	superpathway of fucose and rhamnose degradation		2.55412	2.71165	2.88123	3.11964	3.31069	3.49933
305	Sugar Derivative Degradation	sulfoquinovose degradation I		1.87884	2.19357	2.36023	2.58247	3.04629	3.4203
306	ethylmalonyl-CoA pathway	ethylmalonyl-CoA pathway		0.567003	1.59933	2.27532	2.84036	3.08835	3.31692
307	ectoine biosynthesis	ectoine biosynthesis		2.03294	2.23553	2.61443	3.2818	3.45821	3.58438
308	Gallate Degradation	gallate degradation I		1.34706	1.72341	2.13152	3.02296	3.31417	3.48368
309	Proteinogenic Amino Acid Degradation	superpathway of L-threonine metabolism		1.90293	2.28008	2.54303	2.83031	3.03538	3.1966
310	Creatinine Degradation	creatinine degradation I		1.74247	2.11589	2.28406	2.72217	2.94997	3.24145
