# Supplementary material for: Resistance of Tick Gut Microbiome to Anti-Tick Vaccines, Pathogen Infection and Antimicrobial Peptides
Source: Pathogens. 2020 Apr 22;9(4):309. doi: 10.3390/pathogens9040309 (PMC7238099; doi:10.3390/pathogens9040309)
Supplement: Supplementary file 1 [file pathogens-09-00309-s001.zip › Table S3.xlsx]

## Sheet: Cluster 1
Cluster 1 (79 pathways)
Feature ID	Pathway	Level 3	Level 2	Level 1
PWY-4361	S-methyl-5-thio-α-D-ribose 1-phosphate degradation I	S-methyl-5-thio-alpha-D-ribose 1-phosphate degradation	Nucleoside and Nucleotide Degradation	Degradation/Utilization/Assimilation
PWY-6895	superpathway of thiamine diphosphate biosynthesis II	Vitamin Biosynthesis	Cofactor, Prosthetic Group, Electron Carrier, and Vitamin Biosynthesis	Biosynthesis
SULFATE-CYS-PWY	superpathway of sulfate assimilation and cysteine biosynthesis	Sulfur Compound Metabolism	Inorganic Nutrient Metabolism	Degradation/Utilization/Assimilation
PYRIDNUCSYN-PWY	NAD de novo biosynthesis I (from aspartate)	NAD Metabolism	Cofactor, Prosthetic Group, Electron Carrier, and Vitamin Biosynthesis	Biosynthesis
PWY-5971	palmitate biosynthesis II (bacteria and plants)	Fatty Acid Biosynthesis	Fatty Acid and Lipid Biosynthesis	Biosynthesis
PWY-6562	norspermidine biosynthesis	norspermidine biosynthesis	Amine and Polyamine Biosynthesis	Biosynthesis
P161-PWY	acetylene degradation	Fermentation to Acetate	Carboxylate Degradation	Degradation/Utilization/Assimilation
HEXITOLDEGSUPER-PWY	superpathway of hexitol degradation (bacteria)	Sugar Derivative Degradation	Secondary Metabolite Degradation	Degradation/Utilization/Assimilation
PWY-7400	L-arginine biosynthesis IV (archaebacteria)	Proteinogenic Amino Acid Biosynthesis	Amino Acid Biosynthesis	Biosynthesis
P441-PWY	superpathway of N-acetylneuraminate degradation	superpathway of N-acetylneuraminate degradation	Carboxylate Degradation	Degradation/Utilization/Assimilation
PWY-5347	superpathway of L-methionine biosynthesis (transsulfuration)	Proteinogenic Amino Acid Biosynthesis	Amino Acid Biosynthesis	Biosynthesis
ASPASN-PWY	superpathway of L-aspartate and L-asparagine biosynthesis	superpathway of L-aspartate and L-asparagine biosynthesis	Amino Acid Biosynthesis	Biosynthesis
PWY-7094	fatty acid salvage	Fatty Acid Biosynthesis	Fatty Acid and Lipid Biosynthesis	Biosynthesis
PWY-6269	superpathway of adenosylcobalamin salvage from cobinamide II	Vitamin Biosynthesis	Cofactor, Prosthetic Group, Electron Carrier, and Vitamin Biosynthesis	Biosynthesis
PWY-5345	superpathway of L-methionine biosynthesis (by sulfhydrylation)	Proteinogenic Amino Acid Biosynthesis	Amino Acid Biosynthesis	Biosynthesis
PWY-4984	urea cycle	Nitrogen Compound Metabolism	Inorganic Nutrient Metabolism	Degradation/Utilization/Assimilation
PWY0-41	allantoin degradation IV (anaerobic)	Allantoin Degradation	Amine and Polyamine Degradation	Degradation/Utilization/Assimilation
PWY-6545	pyrimidine deoxyribonucleotides de novo biosynthesis III	2'-Deoxyribonucleotide Biosynthesis	Nucleoside and Nucleotide Biosynthesis	Biosynthesis
PWY-5845	superpathway of menaquinol-9 biosynthesis	Quinol and Quinone Biosynthesis	Cofactor, Prosthetic Group, Electron Carrier, and Vitamin Biosynthesis	Biosynthesis
PWY-6901	superpathway of glucose and xylose degradation	Sugar Degradation	Carbohydrate Degradation	Degradation/Utilization/Assimilation
ARGORNPROST-PWY	L-arginine degradation (Stickland reaction)	Proteinogenic Amino Acid Degradation	Amino Acid Degradation	Degradation/Utilization/Assimilation
PWY-5121	superpathway of geranylgeranyl diphosphate biosynthesis II (via MEP)	Polyprenyl Biosynthesis	Cofactor, Prosthetic Group, Electron Carrier, and Vitamin Biosynthesis	Biosynthesis
ARGSYN-PWY	L-arginine biosynthesis I (via L-ornithine)	Proteinogenic Amino Acid Biosynthesis	Amino Acid Biosynthesis	Biosynthesis
PWY-6151	S-adenosyl-L-methionine cycle I	Proteinogenic Amino Acid Biosynthesis	Amino Acid Biosynthesis	Biosynthesis
PWY-7187	pyrimidine deoxyribonucleotides de novo biosynthesis II	2'-Deoxyribonucleotide Biosynthesis	Nucleoside and Nucleotide Biosynthesis	Biosynthesis
DENOVOPURINE2-PWY	superpathway of purine nucleotides de novo biosynthesis II	Purine Nucleotide Biosynthesis	Nucleoside and Nucleotide Biosynthesis	Biosynthesis
PWY-7046	4-coumarate degradation (anaerobic)	Phenolic Compound Degradation	Aromatic Compound Degradation	Degradation/Utilization/Assimilation
PWY-5705	allantoin degradation to glyoxylate III	Allantoin Degradation	Amine and Polyamine Degradation	Degradation/Utilization/Assimilation
PWY-6353	purine nucleotides degradation II (aerobic)	Purine Nucleotide Degradation	Nucleoside and Nucleotide Degradation	Degradation/Utilization/Assimilation
PWY0-1479	tRNA processing	tRNA processing	Nucleic Acid Processing	Macromolecule Modification
PWY-6612	superpathway of tetrahydrofolate biosynthesis	Vitamin Biosynthesis	Cofactor, Prosthetic Group, Electron Carrier, and Vitamin Biosynthesis	Biosynthesis
PWY0-1261	anhydromuropeptides recycling I	Sugar Derivative Degradation	Secondary Metabolite Degradation	Degradation/Utilization/Assimilation
PWY-7003	glycerol degradation to butanol	Fermentation to Alcohols	Fermentation	Generation of Precursor Metabolite and Energy
PWY-5415	catechol degradation I (meta-cleavage pathway)	Catechol Degradation	Aromatic Compound Degradation	Degradation/Utilization/Assimilation
PWY-6713	L-rhamnose degradation II	Sugar Degradation	Carbohydrate Degradation	Degradation/Utilization/Assimilation
THREOCAT-PWY	superpathway of L-threonine metabolism	Proteinogenic Amino Acid Degradation	Amino Acid Degradation	Degradation/Utilization/Assimilation
PWY-7199	pyrimidine deoxyribonucleosides salvage	Pyrimidine Nucleotide Biosynthesis	Nucleoside and Nucleotide Biosynthesis	Biosynthesis
P42-PWY	incomplete reductive TCA cycle	CO2 Fixation	C1 Compound Utilization and Assimilation	Degradation/Utilization/Assimilation
PWY-6386	UDP-N-acetylmuramoyl-pentapeptide biosynthesis II (lysine-containing)	Cell Wall Biosynthesis	Cell Structure Biosynthesis	Biosynthesis
PWY-5505	L-glutamate and L-glutamine biosynthesis	Proteinogenic Amino Acid Biosynthesis	Amino Acid Biosynthesis	Biosynthesis
PWY-6396	superpathway of 2,3-butanediol biosynthesis	Fermentation to Alcohols	Fermentation	Generation of Precursor Metabolite and Energy
PWY-6609	adenine and adenosine salvage III	Purine Nucleotide Biosynthesis	Nucleoside and Nucleotide Biosynthesis	Biosynthesis
P281-PWY	3-phenylpropanoate degradation	Phenolic Compound Degradation	Aromatic Compound Degradation	Degradation/Utilization/Assimilation
PWY-5100	pyruvate fermentation to acetate and lactate II	Fermentation to Acetate	Carboxylate Degradation	Degradation/Utilization/Assimilation
PWY-6906	chitin derivatives degradation	Polysaccharide Degradation	Carbohydrate Degradation	Degradation/Utilization/Assimilation
PWY-7084	nitrifier denitrification	Nitrogen Compound Metabolism	Inorganic Nutrient Metabolism	Degradation/Utilization/Assimilation
FOLSYN-PWY	superpathway of tetrahydrofolate biosynthesis and salvage	Vitamin Biosynthesis	Cofactor, Prosthetic Group, Electron Carrier, and Vitamin Biosynthesis	Biosynthesis
PWY-5896	superpathway of menaquinol-10 biosynthesis	Quinol and Quinone Biosynthesis	Cofactor, Prosthetic Group, Electron Carrier, and Vitamin Biosynthesis	Biosynthesis
CRNFORCAT-PWY	creatinine degradation I	Creatinine Degradation	Amine and Polyamine Degradation	Degradation/Utilization/Assimilation
PWY-5860	superpathway of demethylmenaquinol-6 biosynthesis I	Quinol and Quinone Biosynthesis	Cofactor, Prosthetic Group, Electron Carrier, and Vitamin Biosynthesis	Biosynthesis
PWY-6641	superpathway of sulfolactate degradation	Sulfur Compound Metabolism	Inorganic Nutrient Metabolism	Degradation/Utilization/Assimilation
PWY-5022	4-aminobutanoate degradation V	4-Aminobutanoate Degradation	Amine and Polyamine Degradation	Degradation/Utilization/Assimilation
PWY-5178	toluene degradation IV (aerobic) (via catechol)	Toluene Degradation	Aromatic Compound Degradation	Degradation/Utilization/Assimilation
ALL-CHORISMATE-PWY	superpathway of chorismate metabolism	Superpathways	Superpathways	Superpathways
PWY-5862	superpathway of demethylmenaquinol-9 biosynthesis	Quinol and Quinone Biosynthesis	Cofactor, Prosthetic Group, Electron Carrier, and Vitamin Biosynthesis	Biosynthesis
PWY-5850	superpathway of menaquinol-6 biosynthesis I	Quinol and Quinone Biosynthesis	Cofactor, Prosthetic Group, Electron Carrier, and Vitamin Biosynthesis	Biosynthesis
ARGSYNBSUB-PWY	L-arginine biosynthesis II (acetyl cycle)	Proteinogenic Amino Acid Biosynthesis	Amino Acid Biosynthesis	Biosynthesis
PWY-7323	superpathway of GDP-mannose-derived O-antigen building blocks biosynthesis	Sugar Biosynthesis	Carbohydrate Biosynthesis	Biosynthesis
PWY-6608	guanosine nucleotides degradation III	Purine Nucleotide Degradation	Nucleoside and Nucleotide Degradation	Degradation/Utilization/Assimilation
P341-PWY	glycolysis V (Pyrococcus)	glycolysis V (Pyrococcus)	Glycolysis	Generation of Precursor Metabolite and Energy
PWY-7196	superpathway of pyrimidine ribonucleosides salvage	Pyrimidine Nucleotide Biosynthesis	Nucleoside and Nucleotide Biosynthesis	Biosynthesis
PWY-7392	taxadiene biosynthesis (engineered)	Terpenoid Biosynthesis	Secondary Metabolite Biosynthesis	Biosynthesis
PWY-7527	L-methionine salvage cycle III	Proteinogenic Amino Acid Biosynthesis	Amino Acid Biosynthesis	Biosynthesis
P23-PWY	reductive TCA cycle I	CO2 Fixation	C1 Compound Utilization and Assimilation	Degradation/Utilization/Assimilation
PWY-7376	cob(II)yrinate a,c-diamide biosynthesis II (late cobalt incorporation)	cob(II)yrinate a,c-diamide biosynthesis	Cofactor, Prosthetic Group, Electron Carrier, and Vitamin Biosynthesis	Biosynthesis
PWY-5509	adenosylcobalamin biosynthesis from adenosylcobinamide-GDP I	Vitamin Biosynthesis	Cofactor, Prosthetic Group, Electron Carrier, and Vitamin Biosynthesis	Biosynthesis
PWY-5028	L-histidine degradation II	Proteinogenic Amino Acid Degradation	Amino Acid Degradation	Degradation/Utilization/Assimilation
PRPP-PWY	superpathway of histidine, purine, and pyrimidine biosynthesis	Superpathways	Superpathways	Superpathways
PWY-6891	thiazole biosynthesis II (aerobic bacteria)	Vitamin Biosynthesis	Cofactor, Prosthetic Group, Electron Carrier, and Vitamin Biosynthesis	Biosynthesis
PWY-622	starch biosynthesis	Glycan Biosynthesis	Carbohydrate Biosynthesis	Biosynthesis
PWY0-1297	superpathway of purine deoxyribonucleosides degradation	superpathway of purine deoxyribonucleosides degradation	Nucleoside and Nucleotide Degradation	Degradation/Utilization/Assimilation
PWY-6317	D-galactose degradation I (Leloir pathway)	Sugar Degradation	Carbohydrate Degradation	Degradation/Utilization/Assimilation
PWY-7200	superpathway of pyrimidine deoxyribonucleoside salvage	Pyrimidine Nucleotide Biosynthesis	Nucleoside and Nucleotide Biosynthesis	Biosynthesis
PWY-1422	vitamin E biosynthesis (tocopherols)	Quinol and Quinone Biosynthesis	Cofactor, Prosthetic Group, Electron Carrier, and Vitamin Biosynthesis	Biosynthesis
GLCMANNANAUT-PWY	superpathway of N-acetylglucosamine, N-acetylmannosamine and N-acetylneuraminate degradation	superpathway of N-acetylglucosamine, N-acetylmannosamine and N-acetylneuraminate degradation	Amine and Polyamine Degradation	Degradation/Utilization/Assimilation
COBALSYN-PWY	superpathway of adenosylcobalamin salvage from cobinamide I	Vitamin Biosynthesis	Cofactor, Prosthetic Group, Electron Carrier, and Vitamin Biosynthesis	Biosynthesis
3-HYDROXYPHENYLACETATE-DEGRADATION-PWY	4-hydroxyphenylacetate degradation	4-hydroxyphenylacetate degradation	Aromatic Compound Degradation	Degradation/Utilization/Assimilation
SO4ASSIM-PWY	assimilatory sulfate reduction I	Sulfur Compound Metabolism	Inorganic Nutrient Metabolism	Degradation/Utilization/Assimilation

## Sheet: Cluster 2
Cluster 2 (23 Pathways)
Feature ID	Pathway	Level 3	Level 2	Level 1
ORNARGDEG-PWY	superpathway of L-arginine and L-ornithine degradation	Proteinogenic Amino Acid Degradation	Amino Acid Degradation	Degradation/Utilization/Assimilation
PWY-7315	dTDP-N-acetylthomosamine biosynthesis	Sugar Biosynthesis	Carbohydrate Biosynthesis	Biosynthesis
GALACT-GLUCUROCAT-PWY	superpathway of hexuronide and hexuronate degradation	Superpathways	Superpathways	Superpathways
GLUCARGALACTSUPER-PWY	superpathway of D-glucarate and D-galactarate degradation	Superpathways	Superpathways	Superpathways
PWY0-1241	ADP-L-glycero-β-D-manno-heptose biosynthesis	Sugar Biosynthesis	Carbohydrate Biosynthesis	Biosynthesis
GLUCARDEG-PWY	D-glucarate degradation I	Sugar Acid Degradation	Carboxylate Degradation	Degradation/Utilization/Assimilation
PWY0-1338	polymyxin resistance	Lipopolysaccharide Biosynthesis	Cell Structure Biosynthesis	Biosynthesis
AST-PWY	L-arginine degradation II (AST pathway)	Proteinogenic Amino Acid Degradation	Amino Acid Degradation	Degradation/Utilization/Assimilation
GLUCUROCAT-PWY	superpathway of β-D-glucuronosides degradation	Sugar Derivative Degradation	Secondary Metabolite Degradation	Degradation/Utilization/Assimilation
GALACTUROCAT-PWY	D-galacturonate degradation I	Sugar Acid Degradation	Carboxylate Degradation	Degradation/Utilization/Assimilation
PWY-6507	4-deoxy-L-threo-hex-4-enopyranuronate degradation	Sugar Derivative Degradation	Secondary Metabolite Degradation	Degradation/Utilization/Assimilation
PWY0-1533	methylphosphonate degradation I	Phosphorus Compound Metabolism	Inorganic Nutrient Metabolism	Degradation/Utilization/Assimilation
PWY-6565	superpathway of polyamine biosynthesis III	superpathway of polyamine biosynthesis III	Amine and Polyamine Biosynthesis	Biosynthesis
P461-PWY	hexitol fermentation to lactate, formate, ethanol and acetate	Fermentation to Acetate	Carboxylate Degradation	Degradation/Utilization/Assimilation
RHAMCAT-PWY	L-rhamnose degradation I	Sugar Degradation	Carbohydrate Degradation	Degradation/Utilization/Assimilation
ARGDEG-PWY	superpathway of L-arginine, putrescine, and 4-aminobutanoate degradation	Proteinogenic Amino Acid Degradation	Amino Acid Degradation	Degradation/Utilization/Assimilation
ECASYN-PWY	enterobacterial common antigen biosynthesis	Lipopolysaccharide Biosynthesis	Cell Structure Biosynthesis	Biosynthesis
GALACTARDEG-PWY	D-galactarate degradation I	Sugar Acid Degradation	Carboxylate Degradation	Degradation/Utilization/Assimilation
PWY-4722	creatinine degradation II	Creatinine Degradation	Amine and Polyamine Degradation	Degradation/Utilization/Assimilation
PWY-7242	D-fructuronate degradation	Sugar Acid Degradation	Carboxylate Degradation	Degradation/Utilization/Assimilation
KDO-NAGLIPASYN-PWY	superpathway of (Kdo)2-lipid A biosynthesis	Lipopolysaccharide Biosynthesis	Cell Structure Biosynthesis	Biosynthesis
KETOGLUCONMET-PWY	ketogluconate metabolism	Sugar Acid Degradation	Carboxylate Degradation	Degradation/Utilization/Assimilation
ORNDEG-PWY	superpathway of ornithine degradation	superpathway of ornithine degradation	Amine and Polyamine Degradation	Degradation/Utilization/Assimilation

## Sheet: Cluster 3
Cluster 3 (211 pathways)
Feature ID	Pathway	Level 3	Level 2	Level 1
PWY-7446	sulfoquinovose degradation I	Sugar Derivative Degradation	Secondary Metabolite Degradation	Degradation/Utilization/Assimilation
PWY-2221	Entner-Doudoroff pathway III (semi-phosphorylative)	Sugar Degradation	Carbohydrate Degradation	Degradation/Utilization/Assimilation
PWY-7184	pyrimidine deoxyribonucleotides de novo biosynthesis I	2'-Deoxyribonucleotide Biosynthesis	Nucleoside and Nucleotide Biosynthesis	Biosynthesis
PWY-5427	naphthalene degradation (aerobic)	Naphthalene Degradation	Aromatic Compound Degradation	Degradation/Utilization/Assimilation
PWY-6956	naphthalene degradation to acetyl-CoA	naphthalene degradation to acetyl-CoA	Aromatic Compound Degradation	Degradation/Utilization/Assimilation
HSERMETANA-PWY	L-methionine biosynthesis III	Proteinogenic Amino Acid Biosynthesis	Amino Acid Biosynthesis	Biosynthesis
UBISYN-PWY	superpathway of ubiquinol-8 biosynthesis (prokaryotic)	Quinol and Quinone Biosynthesis	Cofactor, Prosthetic Group, Electron Carrier, and Vitamin Biosynthesis	Biosynthesis
PWY4FS-7	phosphatidylglycerol biosynthesis I (plastidic)	Phospholipid Biosynthesis	Fatty Acid and Lipid Biosynthesis	Biosynthesis
PWY-1269	CMP-3-deoxy-D-manno-octulosonate biosynthesis	Sugar Biosynthesis	Carbohydrate Biosynthesis	Biosynthesis
PWY-5656	mannosylglycerate biosynthesis I	Organic Solute Biosynthesis	Metabolic Regulator Biosynthesis	Biosynthesis
GLUCONEO-PWY	gluconeogenesis I	Sugar Biosynthesis	Carbohydrate Biosynthesis	Biosynthesis
PWY-3001	superpathway of L-isoleucine biosynthesis I	Proteinogenic Amino Acid Biosynthesis	Amino Acid Biosynthesis	Biosynthesis
PWY-7560	methylerythritol phosphate pathway II	Terpenoid Biosynthesis	Secondary Metabolite Biosynthesis	Biosynthesis
PWY-6630	superpathway of L-tyrosine biosynthesis	Proteinogenic Amino Acid Biosynthesis	Amino Acid Biosynthesis	Biosynthesis
GLYCOLYSIS-E-D	superpathway of glycolysis and the Entner-Doudoroff pathway	superpathway of glycolysis and the Entner-Doudoroff pathway	superpathway of glycolysis and the Entner-Doudoroff pathway	Generation of Precursor Metabolite and Energy
GLYCOLYSIS	glycolysis I (from glucose 6-phosphate)	glycolysis I (from glucose 6-phosphate)	Glycolysis	Generation of Precursor Metabolite and Energy
PWY-5856	ubiquinol-9 biosynthesis (prokaryotic)	Quinol and Quinone Biosynthesis	Cofactor, Prosthetic Group, Electron Carrier, and Vitamin Biosynthesis	Biosynthesis
PWY0-321	phenylacetate degradation I (aerobic)	Phenolic Compound Degradation	Aromatic Compound Degradation	Degradation/Utilization/Assimilation
PWY-7354	aclacinomycin biosynthesis	Antibiotic Biosynthesis	Secondary Metabolite Biosynthesis	Biosynthesis
PWY-5667	CDP-diacylglycerol biosynthesis I	Phospholipid Biosynthesis	Fatty Acid and Lipid Biosynthesis	Biosynthesis
NAD-BIOSYNTHESIS-II	NAD salvage pathway III (to nicotinamide riboside)	NAD Metabolism	Cofactor, Prosthetic Group, Electron Carrier, and Vitamin Biosynthesis	Biosynthesis
PWY-7328	superpathway of UDP-glucose-derived O-antigen building blocks biosynthesis	Sugar Biosynthesis	Carbohydrate Biosynthesis	Biosynthesis
DTDPRHAMSYN-PWY	dTDP-L-rhamnose biosynthesis	Sugar Biosynthesis	Carbohydrate Biosynthesis	Biosynthesis
PEPTIDOGLYCANSYN-PWY	peptidoglycan biosynthesis I (meso-diaminopimelate containing)	Cell Wall Biosynthesis	Cell Structure Biosynthesis	Biosynthesis
PWY-5695	inosine 5'-phosphate degradation	Purine Nucleotide Degradation	Nucleoside and Nucleotide Degradation	Degradation/Utilization/Assimilation
PWY-6387	UDP-N-acetylmuramoyl-pentapeptide biosynthesis I (meso-diaminopimelate containing)	Cell Wall Biosynthesis	Cell Structure Biosynthesis	Biosynthesis
CATECHOL-ORTHO-CLEAVAGE-PWY	catechol degradation to β-ketoadipate	Catechol Degradation	Aromatic Compound Degradation	Degradation/Utilization/Assimilation
HISDEG-PWY	L-histidine degradation I	Proteinogenic Amino Acid Degradation	Amino Acid Degradation	Degradation/Utilization/Assimilation
HISTSYN-PWY	L-histidine biosynthesis	Proteinogenic Amino Acid Biosynthesis	Amino Acid Biosynthesis	Biosynthesis
ENTBACSYN-PWY	enterobactin biosynthesis	Siderophore Biosynthesis	Secondary Metabolite Biosynthesis	Biosynthesis
PWY-5918	superpathay of heme b biosynthesis from glutamate	Porphyrin Compound Biosynthesis	Cofactor, Prosthetic Group, Electron Carrier, and Vitamin Biosynthesis	Biosynthesis
PWY-2942	L-lysine biosynthesis III	Proteinogenic Amino Acid Biosynthesis	Amino Acid Biosynthesis	Biosynthesis
PWY-6703	preQ0 biosynthesis	preQ0 biosynthesis	Secondary Metabolite Biosynthesis	Biosynthesis
PWY-6122	5-aminoimidazole ribonucleotide biosynthesis II	Purine Nucleotide Biosynthesis	Nucleoside and Nucleotide Biosynthesis	Biosynthesis
PWY-6167	flavin biosynthesis II (archaea)	Vitamin Biosynthesis	Cofactor, Prosthetic Group, Electron Carrier, and Vitamin Biosynthesis	Biosynthesis
PWY-6993	nicotine degradation II (pyrrolidine pathway)	Nicotine Degradation	Degradation/Utilization/Assimilation - Other	Degradation/Utilization/Assimilation
PWY-7219	adenosine ribonucleotides de novo biosynthesis	Purine Nucleotide Biosynthesis	Nucleoside and Nucleotide Biosynthesis	Biosynthesis
PWY-7014	paromamine biosynthesis I	Antibiotic Biosynthesis	Secondary Metabolite Biosynthesis	Biosynthesis
PWY-5913	partial TCA cycle (obligate autotrophs)	partial TCA cycle (obligate autotrophs)	TCA cycle	Generation of Precursor Metabolite and Energy
PWY-5273	p-cumate degradation	p-cumate degradation	Aromatic Compound Degradation	Degradation/Utilization/Assimilation
PWY-7221	guanosine ribonucleotides de novo biosynthesis	Purine Nucleotide Biosynthesis	Nucleoside and Nucleotide Biosynthesis	Biosynthesis
PWY-7197	pyrimidine deoxyribonucleotide phosphorylation	Pyrimidine Nucleotide Biosynthesis	Nucleoside and Nucleotide Biosynthesis	Biosynthesis
ANAEROFRUCAT-PWY	homolactic fermentation	Fermentation to Short-Chain Fatty Acids	Fermentation	Generation of Precursor Metabolite and Energy
RIBOSYN2-PWY	flavin biosynthesis I (bacteria and plants)	Vitamin Biosynthesis	Cofactor, Prosthetic Group, Electron Carrier, and Vitamin Biosynthesis	Biosynthesis
TRNA-CHARGING-PWY	tRNA charging	tRNA charging	Aminoacyl-tRNA Charging	Biosynthesis
NONOXIPENT-PWY	pentose phosphate pathway (non-oxidative branch)	pentose phosphate pathway (non-oxidative branch)	Pentose Phosphate Pathways	Generation of Precursor Metabolite and Energy
FUC-RHAMCAT-PWY	superpathway of fucose and rhamnose degradation	Superpathways	Superpathways	Superpathways
GLUCOSE1PMETAB-PWY	glucose and glucose-1-phosphate degradation	Sugar Degradation	Carbohydrate Degradation	Degradation/Utilization/Assimilation
PWY-5686	UMP biosynthesis I	Pyrimidine Nucleotide Biosynthesis	Nucleoside and Nucleotide Biosynthesis	Biosynthesis
PWY-5188	tetrapyrrole biosynthesis I (from glutamate)	Tetrapyrrole Biosynthesis	Cofactor, Prosthetic Group, Electron Carrier, and Vitamin Biosynthesis	Biosynthesis
PWY-7013	(S)-propane-1,2-diol degradation	(S)-propane-1,2-diol degradation	Alcohol Degradation	Degradation/Utilization/Assimilation
PWY-5747	2-methylcitrate cycle II	Propanoate Degradation	Carboxylate Degradation	Degradation/Utilization/Assimilation
PYRIDNUCSAL-PWY	NAD salvage pathway I (PNC VI cycle)	NAD Metabolism	Cofactor, Prosthetic Group, Electron Carrier, and Vitamin Biosynthesis	Biosynthesis
PWY-6629	superpathway of L-tryptophan biosynthesis	Proteinogenic Amino Acid Biosynthesis	Amino Acid Biosynthesis	Biosynthesis
GLYCOGENSYNTH-PWY	glycogen biosynthesis I (from ADP-D-Glucose)	Glycan Biosynthesis	Carbohydrate Biosynthesis	Biosynthesis
PWY-6163	chorismate biosynthesis from 3-dehydroquinate	Chorismate Biosynthesis	Aromatic Compound Biosynthesis	Biosynthesis
PWY-5392	reductive TCA cycle II	CO2 Fixation	C1 Compound Utilization and Assimilation	Degradation/Utilization/Assimilation
ANAGLYCOLYSIS-PWY	glycolysis III (from glucose)	glycolysis III (from glucose)	Glycolysis	Generation of Precursor Metabolite and Energy
PWY-3781	aerobic respiration I (cytochrome c)	aerobic respiration I (cytochrome c)	Electron Transfer	Generation of Precursor Metabolite and Energy
ARO-PWY	chorismate biosynthesis I	Chorismate Biosynthesis	Aromatic Compound Biosynthesis	Biosynthesis
PWY-5179	toluene degradation V (aerobic) (via toluene-cis-diol)	Toluene Degradation	Aromatic Compound Degradation	Degradation/Utilization/Assimilation
PWY-7539	6-hydroxymethyl-dihydropterin diphosphate biosynthesis III (Chlamydia)	Vitamin Biosynthesis	Cofactor, Prosthetic Group, Electron Carrier, and Vitamin Biosynthesis	Biosynthesis
COLANSYN-PWY	colanic acid building blocks biosynthesis	colanic acid building blocks biosynthesis	Carbohydrate Biosynthesis	Biosynthesis
GLYCOLYSIS-TCA-GLYOX-BYPASS	superpathway of glycolysis, pyruvate dehydrogenase, TCA, and glyoxylate bypass	superpathway of glycolysis, pyruvate dehydrogenase, TCA, and glyoxylate bypass	superpathway of glycolysis, pyruvate dehydrogenase, TCA, and glyoxylate bypass	Generation of Precursor Metabolite and Energy
PWY-6182	superpathway of salicylate degradation	superpathway of salicylate degradation	Aromatic Compound Degradation	Degradation/Utilization/Assimilation
PWY-5484	glycolysis II (from fructose 6-phosphate)	glycolysis II (from fructose 6-phosphate)	Glycolysis	Generation of Precursor Metabolite and Energy
PWY-5499	vitamin B6 degradation	vitamin B6 degradation	Cofactor, Prosthetic Group, Electron Carrier Degradation	Degradation/Utilization/Assimilation
PWY0-1061	superpathway of L-alanine biosynthesis	Proteinogenic Amino Acid Biosynthesis	Amino Acid Biosynthesis	Biosynthesis
PANTOSYN-PWY	superpathway of coenzyme A biosynthesis I (bacteria)	Coenzyme A Biosynthesis	Cofactor, Prosthetic Group, Electron Carrier, and Vitamin Biosynthesis	Biosynthesis
PWY-6915	pentalenolactone biosynthesis	Antibiotic Biosynthesis	Secondary Metabolite Biosynthesis	Biosynthesis
PWY-6660	2-heptyl-3-hydroxy-4(1H)-quinolone biosynthesis	2-heptyl-3-hydroxy-4(1H)-quinolone biosynthesis	Secondary Metabolite Biosynthesis	Biosynthesis
CENTBENZCOA-PWY	benzoyl-CoA degradation II (anaerobic)	Benzoyl-CoA Degradation	Aromatic Compound Degradation	Degradation/Utilization/Assimilation
PWY-5855	ubiquinol-7 biosynthesis (prokaryotic)	Quinol and Quinone Biosynthesis	Cofactor, Prosthetic Group, Electron Carrier, and Vitamin Biosynthesis	Biosynthesis
PWY-7111	pyruvate fermentation to isobutanol (engineered)	Fermentation of Pyruvate	Fermentation	Generation of Precursor Metabolite and Energy
PWY-5154	L-arginine biosynthesis III (via N-acetyl-L-citrulline)	Proteinogenic Amino Acid Biosynthesis	Amino Acid Biosynthesis	Biosynthesis
PWY-5104	L-isoleucine biosynthesis IV	Proteinogenic Amino Acid Biosynthesis	Amino Acid Biosynthesis	Biosynthesis
PWY4FS-8	phosphatidylglycerol biosynthesis II (non-plastidic)	Phospholipid Biosynthesis	Fatty Acid and Lipid Biosynthesis	Biosynthesis
PWY0-1586	peptidoglycan maturation (meso-diaminopimelate containing)	Cell Wall Biosynthesis	Cell Structure Biosynthesis	Biosynthesis
PWY-7208	superpathway of pyrimidine nucleobases salvage	Pyrimidine Nucleotide Biosynthesis	Nucleoside and Nucleotide Biosynthesis	Biosynthesis
NONMEVIPP-PWY	methylerythritol phosphate pathway I	Terpenoid Biosynthesis	Secondary Metabolite Biosynthesis	Biosynthesis
PWY-6519	8-amino-7-oxononanoate biosynthesis I	8-Amino-7-oxononanoate Biosynthesis	Other Biosynthesis	Biosynthesis
1CMET2-PWY	N10-formyl-tetrahydrofolate biosynthesis	Vitamin Biosynthesis	Cofactor, Prosthetic Group, Electron Carrier, and Vitamin Biosynthesis	Biosynthesis
CALVIN-PWY	Calvin-Benson-Bassham cycle	Sugar Biosynthesis	Carbohydrate Biosynthesis	Biosynthesis
PWY-5973	cis-vaccenate biosynthesis	Fatty Acid Biosynthesis	Fatty Acid and Lipid Biosynthesis	Biosynthesis
PWY-5180	toluene degradation I (aerobic) (via o-cresol)	Toluene Degradation	Aromatic Compound Degradation	Degradation/Utilization/Assimilation
FAO-PWY	fatty acid β-oxidation I	Fatty Acid Degradation	Fatty Acid and Lipid Degradation	Degradation/Utilization/Assimilation
PWY0-781	aspartate superpathway	Superpathways	Superpathways	Superpathways
PWY-7431	aromatic biogenic amine degradation (bacteria)	aromatic biogenic amine degradation (bacteria)	Amine and Polyamine Degradation	Degradation/Utilization/Assimilation
PWY-5675	nitrate reduction V (assimilatory)	Nitrogen Compound Metabolism	Inorganic Nutrient Metabolism	Degradation/Utilization/Assimilation
PWY-6121	5-aminoimidazole ribonucleotide biosynthesis I	Purine Nucleotide Biosynthesis	Nucleoside and Nucleotide Biosynthesis	Biosynthesis
PWY-5744	glyoxylate assimilation	CO2 Fixation	C1 Compound Utilization and Assimilation	Degradation/Utilization/Assimilation
PWY-3941	β-alanine biosynthesis II	Other Amino Acid Biosynthesis	Amino Acid Biosynthesis	Biosynthesis
PWY-6700	queuosine biosynthesis	queuosine biosynthesis	Nucleic Acid Processing	Macromolecule Modification
PWY-6125	superpathway of guanosine nucleotides de novo biosynthesis II	Purine Nucleotide Biosynthesis	Nucleoside and Nucleotide Biosynthesis	Biosynthesis
PWY-841	superpathway of purine nucleotides de novo biosynthesis I	Purine Nucleotide Biosynthesis	Nucleoside and Nucleotide Biosynthesis	Biosynthesis
PWY-7220	adenosine deoxyribonucleotides de novo biosynthesis II	2'-Deoxyribonucleotide Biosynthesis	Nucleoside and Nucleotide Biosynthesis	Biosynthesis
P221-PWY	octane oxidation	octane oxidation	Degradation/Utilization/Assimilation - Other	Degradation/Utilization/Assimilation
PWY0-845	superpathway of pyridoxal 5'-phosphate biosynthesis and salvage	Vitamin Biosynthesis	Cofactor, Prosthetic Group, Electron Carrier, and Vitamin Biosynthesis	Biosynthesis
PWY-7644	heparin degradation	Polysaccharide Degradation	Carbohydrate Degradation	Degradation/Utilization/Assimilation
PWY-6572	chondroitin sulfate degradation I (bacterial)	Polysaccharide Degradation	Carbohydrate Degradation	Degradation/Utilization/Assimilation
LEU-DEG2-PWY	L-leucine degradation I	Proteinogenic Amino Acid Degradation	Amino Acid Degradation	Degradation/Utilization/Assimilation
PANTO-PWY	phosphopantothenate biosynthesis I	Vitamin Biosynthesis	Cofactor, Prosthetic Group, Electron Carrier, and Vitamin Biosynthesis	Biosynthesis
PWY0-862	(5Z)-dodecenoate biosynthesis I	Fatty Acid Biosynthesis	Fatty Acid and Lipid Biosynthesis	Biosynthesis
PWY-7234	inosine-5'-phosphate biosynthesis III	Purine Nucleotide Biosynthesis	Nucleoside and Nucleotide Biosynthesis	Biosynthesis
PWY-6147	6-hydroxymethyl-dihydropterin diphosphate biosynthesis I	Vitamin Biosynthesis	Cofactor, Prosthetic Group, Electron Carrier, and Vitamin Biosynthesis	Biosynthesis
PWY-5651	L-tryptophan degradation to 2-amino-3-carboxymuconate semialdehyde	Proteinogenic Amino Acid Degradation	Amino Acid Degradation	Degradation/Utilization/Assimilation
PWY-7211	superpathway of pyrimidine deoxyribonucleotides de novo biosynthesis	2'-Deoxyribonucleotide Biosynthesis	Nucleoside and Nucleotide Biosynthesis	Biosynthesis
PWY-5823	superpathway of CDP-glucose-derived O-antigen building blocks biosynthesis	Sugar Biosynthesis	Carbohydrate Biosynthesis	Biosynthesis
HEMESYN2-PWY	heme b biosynthesis II (anaerobic)	Porphyrin Compound Biosynthesis	Cofactor, Prosthetic Group, Electron Carrier, and Vitamin Biosynthesis	Biosynthesis
PWY-621	sucrose degradation III (sucrose invertase)	Sugar Degradation	Carbohydrate Degradation	Degradation/Utilization/Assimilation
HCAMHPDEG-PWY	3-phenylpropanoate and 3-(3-hydroxyphenyl)propanoate degradation to 2-hydroxypentadienoate	Phenolic Compound Degradation	Aromatic Compound Degradation	Degradation/Utilization/Assimilation
UDPNAGSYN-PWY	UDP-N-acetyl-D-glucosamine biosynthesis I	Sugar Biosynthesis	Carbohydrate Biosynthesis	Biosynthesis
PHOSLIPSYN-PWY	superpathway of phospholipid biosynthesis I (bacteria)	Phospholipid Biosynthesis	Fatty Acid and Lipid Biosynthesis	Biosynthesis
PWY-7254	TCA cycle VII (acetate-producers)	TCA cycle VII (acetate-producers)	TCA cycle	Generation of Precursor Metabolite and Energy
POLYAMINSYN3-PWY	superpathway of polyamine biosynthesis II	superpathway of polyamine biosynthesis II	Amine and Polyamine Biosynthesis	Biosynthesis
GLYOXYLATE-BYPASS	glyoxylate cycle	glyoxylate cycle	glyoxylate cycle	Generation of Precursor Metabolite and Energy
PYRIDOXSYN-PWY	pyridoxal 5'-phosphate biosynthesis I	Vitamin Biosynthesis	Cofactor, Prosthetic Group, Electron Carrier, and Vitamin Biosynthesis	Biosynthesis
POLYAMSYN-PWY	superpathway of polyamine biosynthesis I	superpathway of polyamine biosynthesis I	Amine and Polyamine Biosynthesis	Biosynthesis
COMPLETE-ARO-PWY	superpathway of aromatic amino acid biosynthesis	superpathway of aromatic amino acid biosynthesis	Amino Acid Biosynthesis	Biosynthesis
PWY-7229	superpathway of adenosine nucleotides de novo biosynthesis I	Purine Nucleotide Biosynthesis	Nucleoside and Nucleotide Biosynthesis	Biosynthesis
PWY-6123	inosine-5'-phosphate biosynthesis I	Purine Nucleotide Biosynthesis	Nucleoside and Nucleotide Biosynthesis	Biosynthesis
PWY0-42	2-methylcitrate cycle I	Propanoate Degradation	Carboxylate Degradation	Degradation/Utilization/Assimilation
ARG+POLYAMINE-SYN	superpathway of arginine and polyamine biosynthesis	superpathway of arginine and polyamine biosynthesis	Amine and Polyamine Biosynthesis	Biosynthesis
GLYCOCAT-PWY	glycogen degradation I	Polysaccharide Degradation	Carbohydrate Degradation	Degradation/Utilization/Assimilation
PWY-6690	cinnamate and 3-hydroxycinnamate degradation to 2-hydroxypentadienoate	Phenolic Compound Degradation	Aromatic Compound Degradation	Degradation/Utilization/Assimilation
PWY-6942	dTDP-D-desosamine biosynthesis	Sugar Biosynthesis	Carbohydrate Biosynthesis	Biosynthesis
OANTIGEN-PWY	O-antigen building blocks biosynthesis (E. coli)	Sugar Biosynthesis	Carbohydrate Biosynthesis	Biosynthesis
HOMOSER-METSYN-PWY	L-methionine biosynthesis I	Proteinogenic Amino Acid Biosynthesis	Amino Acid Biosynthesis	Biosynthesis
PWY-6143	CMP-pseudaminate biosynthesis	Sugar Biosynthesis	Carbohydrate Biosynthesis	Biosynthesis
REDCITCYC	TCA cycle VIII (helicobacter)	TCA cycle VIII (Helicobacter)	TCA cycle	Generation of Precursor Metabolite and Energy
PWY-7024	superpathway of the 3-hydroxypropanoate cycle	CO2 Fixation	C1 Compound Utilization and Assimilation	Degradation/Utilization/Assimilation
PWY-6708	ubiquinol-8 biosynthesis (prokaryotic)	Quinol and Quinone Biosynthesis	Cofactor, Prosthetic Group, Electron Carrier, and Vitamin Biosynthesis	Biosynthesis
SER-GLYSYN-PWY	superpathway of L-serine and glycine biosynthesis I	superpathway of L-serine and glycine biosynthesis I	Amino Acid Biosynthesis	Biosynthesis
NAGLIPASYN-PWY	lipid IVA biosynthesis	Lipopolysaccharide Biosynthesis	Cell Structure Biosynthesis	Biosynthesis
PWY-7316	dTDP-N-acetylviosamine biosynthesis	Sugar Biosynthesis	Carbohydrate Biosynthesis	Biosynthesis
PWY0-166	superpathway of pyrimidine deoxyribonucleotides de novo biosynthesis (E. coli)	2'-Deoxyribonucleotide Biosynthesis	Nucleoside and Nucleotide Biosynthesis	Biosynthesis
PWY-5181	toluene degradation III (aerobic) (via p-cresol)	Toluene Degradation	Aromatic Compound Degradation	Degradation/Utilization/Assimilation
PWY-6185	4-methylcatechol degradation (ortho cleavage)	4-methylcatechol degradation (ortho cleavage)	Aromatic Compound Degradation	Degradation/Utilization/Assimilation
MET-SAM-PWY	superpathway of S-adenosyl-L-methionine biosynthesis	Superpathways	Superpathways	Superpathways
BIOTIN-BIOSYNTHESIS-PWY	biotin biosynthesis I	Vitamin Biosynthesis	Cofactor, Prosthetic Group, Electron Carrier, and Vitamin Biosynthesis	Biosynthesis
PWY-5659	GDP-mannose biosynthesis	Sugar Biosynthesis	Carbohydrate Biosynthesis	Biosynthesis
FASYN-ELONG-PWY	fatty acid elongation -- saturated	Fatty Acid Biosynthesis	Fatty Acid and Lipid Biosynthesis	Biosynthesis
METHGLYUT-PWY	superpathway of methylglyoxal degradation	superpathway of methylglyoxal degradation	Aldehyde Degradation	Degradation/Utilization/Assimilation
PWY-7228	superpathway of guanosine nucleotides de novo biosynthesis I	Purine Nucleotide Biosynthesis	Nucleoside and Nucleotide Biosynthesis	Biosynthesis
PWY-5266	p-cymene degradation	p-cymene degradation	Aromatic Compound Degradation	Degradation/Utilization/Assimilation
PWY-6897	thiamine salvage II	Vitamin Biosynthesis	Cofactor, Prosthetic Group, Electron Carrier, and Vitamin Biosynthesis	Biosynthesis
PWY-5743	3-hydroxypropanoate cycle	CO2 Fixation	C1 Compound Utilization and Assimilation	Degradation/Utilization/Assimilation
PWY-5103	L-isoleucine biosynthesis III	Proteinogenic Amino Acid Biosynthesis	Amino Acid Biosynthesis	Biosynthesis
PWY-6385	peptidoglycan biosynthesis III (mycobacteria)	Cell Wall Biosynthesis	Cell Structure Biosynthesis	Biosynthesis
FUCCAT-PWY	fucose degradation	Sugar Degradation	Carbohydrate Degradation	Degradation/Utilization/Assimilation
FERMENTATION-PWY	mixed acid fermentation	Fermentation of Pyruvate	Fermentation	Generation of Precursor Metabolite and Energy
PWY-7664	oleate biosynthesis IV (anaerobic)	Fatty Acid Biosynthesis	Fatty Acid and Lipid Biosynthesis	Biosynthesis
PWY-5679	clavulanate biosynthesis	Antibiotic Biosynthesis	Secondary Metabolite Biosynthesis	Biosynthesis
PWY-6071	superpathway of phenylethylamine degradation	superpathway of phenylethylamine degradation	Amine and Polyamine Degradation	Degradation/Utilization/Assimilation
TCA	TCA cycle I (prokaryotic)	TCA cycle I (prokaryotic)	TCA cycle	Generation of Precursor Metabolite and Energy
GLUTORN-PWY	L-ornithine biosynthesis I	Other Amino Acid Biosynthesis	Amino Acid Biosynthesis	Biosynthesis
PWY-6662	superpathway of quinolone and alkylquinolone biosynthesis	superpathway of quinolone and alkylquinolone biosynthesis	Secondary Metabolite Biosynthesis	Biosynthesis
SALVADEHYPOX-PWY	adenosine nucleotides degradation II	Purine Nucleotide Degradation	Nucleoside and Nucleotide Degradation	Degradation/Utilization/Assimilation
COA-PWY	superpathway of coenzyme A biosynthesis I (bacteria)	Coenzyme A Biosynthesis	Cofactor, Prosthetic Group, Electron Carrier, and Vitamin Biosynthesis	Biosynthesis
PROTOCATECHUATE-ORTHO-CLEAVAGE-PWY	protocatechuate degradation II (ortho-cleavage pathway)	Protocatechuate Degradation	Aromatic Compound Degradation	Degradation/Utilization/Assimilation
PWY-7398	coumarins biosynthesis (engineered)	Phenylpropanoid Derivative Biosynthesis	Secondary Metabolite Biosynthesis	Biosynthesis
PWY-6919	neopentalenoketolactone and pentalenate biosynthesis	Antibiotic Biosynthesis	Secondary Metabolite Biosynthesis	Biosynthesis
HEME-BIOSYNTHESIS-II	heme b biosynthesis I (aerobic)	Porphyrin Compound Biosynthesis	Cofactor, Prosthetic Group, Electron Carrier, and Vitamin Biosynthesis	Biosynthesis
PWY-7002	4-hydroxyacetophenone degradation	4-hydroxyacetophenone degradation	Aromatic Compound Degradation	Degradation/Utilization/Assimilation
PWY-5857	ubiquinol-10 biosynthesis (prokaryotic)	Quinol and Quinone Biosynthesis	Cofactor, Prosthetic Group, Electron Carrier, and Vitamin Biosynthesis	Biosynthesis
PWY-6737	starch degradation V	Polysaccharide Degradation	Carbohydrate Degradation	Degradation/Utilization/Assimilation
DAPLYSINESYN-PWY	L-lysine biosynthesis I	Proteinogenic Amino Acid Biosynthesis	Amino Acid Biosynthesis	Biosynthesis
FASYN-INITIAL-PWY	superpathway of fatty acid biosynthesis initiation (E. coli)	Fatty Acid Biosynthesis	Fatty Acid and Lipid Biosynthesis	Biosynthesis
ILEUSYN-PWY	L-isoleucine biosynthesis I (from threonine)	Proteinogenic Amino Acid Biosynthesis	Amino Acid Biosynthesis	Biosynthesis
PWY-6141	archaetidylserine and archaetidylethanolamine biosynthesis	Phospholipid Biosynthesis	Fatty Acid and Lipid Biosynthesis	Biosynthesis
PWY-5097	L-lysine biosynthesis VI	Proteinogenic Amino Acid Biosynthesis	Amino Acid Biosynthesis	Biosynthesis
BRANCHED-CHAIN-AA-SYN-PWY	superpathway of branched amino acid biosynthesis	Superpathways	Superpathways	Superpathways
VALSYN-PWY	L-valine biosynthesis	Proteinogenic Amino Acid Biosynthesis	Amino Acid Biosynthesis	Biosynthesis
P105-PWY	TCA cycle IV (2-oxoglutarate decarboxylase)	TCA cycle IV (2-oxoglutarate decarboxylase)	TCA cycle	Generation of Precursor Metabolite and Energy
PWYG-321	mycolate biosynthesis	Fatty Acid Biosynthesis	Fatty Acid and Lipid Biosynthesis	Biosynthesis
PWY-5431	aromatic compounds degradation via β-ketoadipate	Catechol Degradation	Aromatic Compound Degradation	Degradation/Utilization/Assimilation
PWY-7222	guanosine deoxyribonucleotides de novo biosynthesis II	2'-Deoxyribonucleotide Biosynthesis	Nucleoside and Nucleotide Biosynthesis	Biosynthesis
PWY-5417	catechol degradation III (ortho-cleavage pathway)	Catechol Degradation	Aromatic Compound Degradation	Degradation/Utilization/Assimilation
PWY-7185	UTP and CTP dephosphorylation I	Pyrimidine Nucleotide Degradation	Nucleoside and Nucleotide Degradation	Degradation/Utilization/Assimilation
PWY-5384	sucrose degradation IV (sucrose phosphorylase)	Sugar Degradation	Carbohydrate Degradation	Degradation/Utilization/Assimilation
PWY-5519	D-arabinose degradation III	Sugar Degradation	Carbohydrate Degradation	Degradation/Utilization/Assimilation
PWY0-1277	3-phenylpropanoate and 3-(3-hydroxyphenyl)propanoate degradation	3-phenylpropanoate and 3-(3-hydroxyphenyl)propanoate degradation	Aromatic Compound Degradation	Degradation/Utilization/Assimilation
PWY-6126	superpathway of adenosine nucleotides de novo biosynthesis II	Purine Nucleotide Biosynthesis	Nucleoside and Nucleotide Biosynthesis	Biosynthesis
PPGPPMET-PWY	ppGpp biosynthesis	ppGpp biosynthesis	Metabolic Regulator Biosynthesis	Biosynthesis
PWY-7663	gondoate biosynthesis (anaerobic)	Fatty Acid Biosynthesis	Fatty Acid and Lipid Biosynthesis	Biosynthesis
TCA-GLYOX-BYPASS	superpathway of glyoxylate bypass and TCA	superpathway of glyoxylate bypass and TCA	TCA cycle	Generation of Precursor Metabolite and Energy
PWY-6282	palmitoleate biosynthesis I (from (5Z)-dodec-5-enoate)	Fatty Acid Biosynthesis	Fatty Acid and Lipid Biosynthesis	Biosynthesis
PENTOSE-P-PWY	pentose phosphate pathway	pentose phosphate pathway	Pentose Phosphate Pathways	Generation of Precursor Metabolite and Energy
PWY0-162	superpathway of pyrimidine ribonucleotides de novo biosynthesis	Pyrimidine Nucleotide Biosynthesis	Nucleoside and Nucleotide Biosynthesis	Biosynthesis
PWY-5101	L-isoleucine biosynthesis II	Proteinogenic Amino Acid Biosynthesis	Amino Acid Biosynthesis	Biosynthesis
PWY-6588	pyruvate fermentation to acetone	Fermentation of Pyruvate	Fermentation	Generation of Precursor Metabolite and Energy
THRESYN-PWY	superpathway of L-threonine biosynthesis	Proteinogenic Amino Acid Biosynthesis	Amino Acid Biosynthesis	Biosynthesis
GLYCOL-GLYOXDEG-PWY	superpathway of glycol metabolism and degradation	superpathway of glycol metabolism and degradation	Alcohol Degradation	Degradation/Utilization/Assimilation
POLYISOPRENSYN-PWY	polyisoprenoid biosynthesis (E. coli)	Polyprenyl Biosynthesis	Cofactor, Prosthetic Group, Electron Carrier, and Vitamin Biosynthesis	Biosynthesis
PWY-5676	acetyl-CoA fermentation to butanoate II	Fermentation to Short-Chain Fatty Acids	Fermentation	Generation of Precursor Metabolite and Energy
PWY-6892	thiazole biosynthesis I (facultative anaerobic bacteria)	Vitamin Biosynthesis	Cofactor, Prosthetic Group, Electron Carrier, and Vitamin Biosynthesis	Biosynthesis
NADSYN-PWY	NAD de novo biosynthesis II (from tryptophan)	NAD Metabolism	Cofactor, Prosthetic Group, Electron Carrier, and Vitamin Biosynthesis	Biosynthesis
TRPSYN-PWY	L-tryptophan biosynthesis	Proteinogenic Amino Acid Biosynthesis	Amino Acid Biosynthesis	Biosynthesis
PWY-6486	D-galacturonate degradation II	Sugar Acid Degradation	Carboxylate Degradation	Degradation/Utilization/Assimilation
PWY-6277	superpathway of 5-aminoimidazole ribonucleotide biosynthesis	Purine Nucleotide Biosynthesis	Nucleoside and Nucleotide Biosynthesis	Biosynthesis
PWY0-1319	CDP-diacylglycerol biosynthesis II	Phospholipid Biosynthesis	Fatty Acid and Lipid Biosynthesis	Biosynthesis
P4-PWY	superpathway of L-lysine, L-threonine and L-methionine biosynthesis I	superpathway of L-lysine, L-threonine and L-methionine biosynthesis I	Amino Acid Biosynthesis	Biosynthesis
PWY-6969	TCA cycle V (2-oxoglutarate:ferredoxin oxidoreductase)	TCA cycle V (2-oxoglutarate:ferredoxin oxidoreductase)	TCA cycle	Generation of Precursor Metabolite and Energy
LIPASYN-PWY	phospholipases	phospholipases	Fatty Acid and Lipid Degradation	Degradation/Utilization/Assimilation
PWY-5182	toluene degradation II (aerobic) (via 4-methylcatechol)	Toluene Degradation	Aromatic Compound Degradation	Degradation/Utilization/Assimilation
PWY-6467	Kdo transfer to lipid IVA III (Chlamydia)	Lipopolysaccharide Biosynthesis	Cell Structure Biosynthesis	Biosynthesis
PWY-6628	superpathway of L-phenylalanine biosynthesis	Proteinogenic Amino Acid Biosynthesis	Amino Acid Biosynthesis	Biosynthesis
TYRFUMCAT-PWY	L-tyrosine degradation I	Proteinogenic Amino Acid Degradation	Amino Acid Degradation	Degradation/Utilization/Assimilation
PWY-5989	stearate biosynthesis II (bacteria and plants)	Fatty Acid Biosynthesis	Fatty Acid and Lipid Biosynthesis	Biosynthesis
THISYN-PWY	superpathway of thiamine diphosphate biosynthesis I	Vitamin Biosynthesis	Cofactor, Prosthetic Group, Electron Carrier, and Vitamin Biosynthesis	Biosynthesis
PWY-5189	tetrapyrrole biosynthesis II (from glycine)	Tetrapyrrole Biosynthesis	Cofactor, Prosthetic Group, Electron Carrier, and Vitamin Biosynthesis	Biosynthesis

## Sheet: Cluster 4
Cluster 4 (78 pathways)
Feature ID	Pathway	Level 3	Level 2	Level 1
PWY-5741	ethylmalonyl-CoA pathway	ethylmalonyl-CoA pathway	ethylmalonyl-CoA pathway	Generation of Precursor Metabolite and Energy
PWY-7159	3,8-divinyl-chlorophyllide a biosynthesis III (aerobic, light independent)	Porphyrin Compound Biosynthesis	Cofactor, Prosthetic Group, Electron Carrier, and Vitamin Biosynthesis	Biosynthesis
PWY-5529	superpathway of bacteriochlorophyll a biosynthesis	Porphyrin Compound Biosynthesis	Cofactor, Prosthetic Group, Electron Carrier, and Vitamin Biosynthesis	Biosynthesis
PWY-6728	methylaspartate cycle	methylaspartate cycle	methylaspartate cycle	Generation of Precursor Metabolite and Energy
LACTOSECAT-PWY	lactose and galactose degradation I	Sugar Degradation	Carbohydrate Degradation	Degradation/Utilization/Assimilation
PWY-5838	superpathway of menaquinol-8 biosynthesis I	Quinol and Quinone Biosynthesis	Cofactor, Prosthetic Group, Electron Carrier, and Vitamin Biosynthesis	Biosynthesis
PWY-6944	androstenedione degradation	Steroid Degradation	Fatty Acid and Lipid Degradation	Degradation/Utilization/Assimilation
PWY0-1298	superpathway of pyrimidine deoxyribonucleosides degradation	Pyrimidine Nucleotide Degradation	Nucleoside and Nucleotide Degradation	Degradation/Utilization/Assimilation
PWY-3661	glycine betaine degradation I	Glycine Betaine Degradation	Amine and Polyamine Degradation	Degradation/Utilization/Assimilation
PWY-5837	2-carboxy-1,4-naphthoquinol biosynthesis	Quinol and Quinone Biosynthesis	Cofactor, Prosthetic Group, Electron Carrier, and Vitamin Biosynthesis	Biosynthesis
PWY-7347	sucrose biosynthesis III	Sugar Biosynthesis	Carbohydrate Biosynthesis	Biosynthesis
PWY-5863	superpathway of phylloquinol biosynthesis	Quinol and Quinone Biosynthesis	Cofactor, Prosthetic Group, Electron Carrier, and Vitamin Biosynthesis	Biosynthesis
GALLATE-DEGRADATION-II-PWY	gallate degradation I	Gallate Degradation	Aromatic Compound Degradation	Degradation/Utilization/Assimilation
PWY-5198	factor 420 biosynthesis	factor 420 biosynthesis	Cofactor, Prosthetic Group, Electron Carrier, and Vitamin Biosynthesis	Biosynthesis
PWY-7007	methyl ketone biosynthesis (engineered)	methyl ketone biosynthesis (engineered)	methyl ketone biosynthesis (engineered)	Generation of Precursor Metabolite and Energy
PWY-5861	superpathway of demethylmenaquinol-8 biosynthesis I	Quinol and Quinone Biosynthesis	Cofactor, Prosthetic Group, Electron Carrier, and Vitamin Biosynthesis	Biosynthesis
DHGLUCONATE-PYR-CAT-PWY	glucose degradation (oxidative)	Sugar Degradation	Carbohydrate Degradation	Degradation/Utilization/Assimilation
P124-PWY	Bifidobacterium shunt	Sugar Degradation	Carbohydrate Degradation	Degradation/Utilization/Assimilation
P381-PWY	adenosylcobalamin biosynthesis II (aerobic)	Vitamin Biosynthesis	Cofactor, Prosthetic Group, Electron Carrier, and Vitamin Biosynthesis	Biosynthesis
P101-PWY	ectoine biosynthesis	ectoine biosynthesis	Amine and Polyamine Biosynthesis	Biosynthesis
P125-PWY	superpathway of (R,R)-butanediol biosynthesis	Fermentation to Alcohols	Fermentation	Generation of Precursor Metabolite and Energy
METHYLGALLATE-DEGRADATION-PWY	methylgallate degradation	methylgallate degradation	Aromatic Compound Degradation	Degradation/Utilization/Assimilation
P122-PWY	heterolactic fermentation	Fermentation of Pyruvate	Fermentation	Generation of Precursor Metabolite and Energy
GALLATE-DEGRADATION-I-PWY	gallate degradation II	Gallate Degradation	Aromatic Compound Degradation	Degradation/Utilization/Assimilation
PWY-6590	superpathway of Clostridium acetobutylicum acidogenic fermentation	Fermentation of Pyruvate	Fermentation	Generation of Precursor Metabolite and Energy
PWY-7371	1,4-dihydroxy-6-naphthoate biosynthesis II	Quinol and Quinone Biosynthesis	Cofactor, Prosthetic Group, Electron Carrier, and Vitamin Biosynthesis	Biosynthesis
LPSSYN-PWY	superpathway of lipopolysaccharide biosynthesis	superpathway of lipopolysaccharide biosynthesis	Fatty Acid and Lipid Biosynthesis	Biosynthesis
P108-PWY	pyruvate fermentation to propanoate I	Fermentation of Pyruvate	Fermentation	Generation of Precursor Metabolite and Energy
PWY490-3	nitrate reduction VI (assimilatory)	Nitrogen Compound Metabolism	Inorganic Nutrient Metabolism	Degradation/Utilization/Assimilation
PWY-7374	1,4-dihydroxy-6-naphthoate biosynthesis I	Quinol and Quinone Biosynthesis	Cofactor, Prosthetic Group, Electron Carrier, and Vitamin Biosynthesis	Biosynthesis
PWY-6731	starch degradation III	Polysaccharide Degradation	Carbohydrate Degradation	Degradation/Utilization/Assimilation
PWY-6581	spirilloxanthin and 2,2'-diketo-spirilloxanthin biosynthesis	Terpenoid Biosynthesis	Secondary Metabolite Biosynthesis	Biosynthesis
PWY0-1296	purine ribonucleosides degradation	Purine Nucleotide Degradation	Nucleoside and Nucleotide Degradation	Degradation/Utilization/Assimilation
PWY-5899	superpathway of menaquinol-13 biosynthesis	Quinol and Quinone Biosynthesis	Cofactor, Prosthetic Group, Electron Carrier, and Vitamin Biosynthesis	Biosynthesis
AEROBACTINSYN-PWY	aerobactin biosynthesis	Siderophore Biosynthesis	Secondary Metabolite Biosynthesis	Biosynthesis
PWY-5897	superpathway of menaquinol-11 biosynthesis	Quinol and Quinone Biosynthesis	Cofactor, Prosthetic Group, Electron Carrier, and Vitamin Biosynthesis	Biosynthesis
CENTFERM-PWY	pyruvate fermentation to butanoate	Fermentation of Pyruvate	Fermentation	Generation of Precursor Metabolite and Energy
PWY-5898	superpathway of menaquinol-12 biosynthesis	Quinol and Quinone Biosynthesis	Cofactor, Prosthetic Group, Electron Carrier, and Vitamin Biosynthesis	Biosynthesis
PWY-6397	mycolyl-arabinogalactan-peptidoglycan complex biosynthesis	Cell Wall Biosynthesis	Cell Structure Biosynthesis	Biosynthesis
PWY-7237	myo-, chiro- and scyllo-inositol degradation	Sugar Derivative Degradation	Secondary Metabolite Degradation	Degradation/Utilization/Assimilation
PWY-7377	cob(II)yrinate a,c-diamide biosynthesis I (early cobalt insertion)	cob(II)yrinate a,c-diamide biosynthesis	Cofactor, Prosthetic Group, Electron Carrier, and Vitamin Biosynthesis	Biosynthesis
PWY-181	photorespiration	photorespiration	Photosynthesis	Generation of Precursor Metabolite and Energy
DENITRIFICATION-PWY	nitrate reduction I (denitrification)	Nitrogen Compound Metabolism	Inorganic Nutrient Metabolism	Degradation/Utilization/Assimilation
PWY-7090	UDP-2,3-diacetamido-2,3-dideoxy-α-D-mannuronate biosynthesis	Sugar Biosynthesis	Carbohydrate Biosynthesis	Biosynthesis
P562-PWY	myo-inositol degradation I	Sugar Derivative Degradation	Secondary Metabolite Degradation	Degradation/Utilization/Assimilation
TEICHOICACID-PWY	poly(glycerol phosphate) wall teichoic acid biosynthesis	Cell Wall Biosynthesis	Cell Structure Biosynthesis	Biosynthesis
PWY-6471	peptidoglycan biosynthesis IV (Enterococcus faecium)	Cell Wall Biosynthesis	Cell Structure Biosynthesis	Biosynthesis
PWY-5920	superpathway of b heme biosynthesis from glycine	Porphyrin Compound Biosynthesis	Cofactor, Prosthetic Group, Electron Carrier, and Vitamin Biosynthesis	Biosynthesis
PWY-6263	superpathway of menaquinol-8 biosynthesis II	Quinol and Quinone Biosynthesis	Cofactor, Prosthetic Group, Electron Carrier, and Vitamin Biosynthesis	Biosynthesis
PWY-7616	methanol oxidation to carbon dioxide	methanol oxidation to carbon dioxide	Alcohol Degradation	Degradation/Utilization/Assimilation
PWY-7255	ergothioneine biosynthesis I (bacteria)	Ergothioneine Biosynthesis	Secondary Metabolite Biosynthesis	Biosynthesis
PWY-6383	mono-trans, poly-cis decaprenyl phosphate biosynthesis	Polyprenyl Biosynthesis	Cofactor, Prosthetic Group, Electron Carrier, and Vitamin Biosynthesis	Biosynthesis
PWY-922	mevalonate pathway I	Terpenoid Biosynthesis	Secondary Metabolite Biosynthesis	Biosynthesis
PWY1G-0	mycothiol biosynthesis	Reductant Biosynthesis	Cofactor, Prosthetic Group, Electron Carrier, and Vitamin Biosynthesis	Biosynthesis
PWY-5304	superpathway of sulfur oxidation (Acidianus ambivalens)	Sulfur Compound Metabolism	Inorganic Nutrient Metabolism	Degradation/Utilization/Assimilation
PWY-6339	syringate degradation	syringate degradation	Aromatic Compound Degradation	Degradation/Utilization/Assimilation
PWY-5507	adenosylcobalamin biosynthesis I (anaerobic)	Vitamin Biosynthesis	Cofactor, Prosthetic Group, Electron Carrier, and Vitamin Biosynthesis	Biosynthesis
PWY-6107	chlorosalicylate degradation	Chloroaromatic Compound Degradation	Aromatic Compound Degradation	Degradation/Utilization/Assimilation
PWY-1622	formaldehyde assimilation I (serine pathway)	Formaldehyde Assimilation	C1 Compound Utilization and Assimilation	Degradation/Utilization/Assimilation
PWY0-1415	superpathway of heme b biosynthesis from uroporphyrinogen-III	Porphyrin Compound Biosynthesis	Cofactor, Prosthetic Group, Electron Carrier, and Vitamin Biosynthesis	Biosynthesis
PWY-5910	superpathway of geranylgeranyldiphosphate biosynthesis I (via mevalonate)	Polyprenyl Biosynthesis	Cofactor, Prosthetic Group, Electron Carrier, and Vitamin Biosynthesis	Biosynthesis
PWY-5941	glycogen degradation II	Polysaccharide Degradation	Carbohydrate Degradation	Degradation/Utilization/Assimilation
P164-PWY	purine nucleobases degradation I (anaerobic)	Purine Nucleotide Degradation	Nucleoside and Nucleotide Degradation	Degradation/Utilization/Assimilation
PWY-1861	formaldehyde assimilation II (assimilatory RuMP Cycle)	Formaldehyde Assimilation	C1 Compound Utilization and Assimilation	Degradation/Utilization/Assimilation
PWY-5265	peptidoglycan biosynthesis II (staphylococci)	Cell Wall Biosynthesis	Cell Structure Biosynthesis	Biosynthesis
RUMP-PWY	formaldehyde oxidation I	Formaldehyde Oxidation	C1 Compound Utilization and Assimilation	Degradation/Utilization/Assimilation
PWY-1882	superpathway of C1 compounds oxidation to CO2	superpathway of C1 compounds oxidation to CO2	C1 Compound Utilization and Assimilation	Degradation/Utilization/Assimilation
P261-PWY	coenzyme M biosynthesis I	Coenzyme M Biosynthesis	Cofactor, Prosthetic Group, Electron Carrier, and Vitamin Biosynthesis	Biosynthesis
PWY-5840	superpathway of menaquinol-7 biosynthesis	Quinol and Quinone Biosynthesis	Cofactor, Prosthetic Group, Electron Carrier, and Vitamin Biosynthesis	Biosynthesis
PWY-5005	biotin biosynthesis II	Vitamin Biosynthesis	Cofactor, Prosthetic Group, Electron Carrier, and Vitamin Biosynthesis	Biosynthesis
PWY-1541	superpathway of taurine degradation	Nitrogen Compound Metabolism	Inorganic Nutrient Metabolism	Degradation/Utilization/Assimilation
PWY-7456	β-(1,4)-mannan degradation	Polysaccharide Degradation	Carbohydrate Degradation	Degradation/Utilization/Assimilation
CHLOROPHYLL-SYN	3,8-divinyl-chlorophyllide a biosynthesis I (aerobic, light-dependent)	Porphyrin Compound Biosynthesis	Cofactor, Prosthetic Group, Electron Carrier, and Vitamin Biosynthesis	Biosynthesis
PWY-6470	peptidoglycan biosynthesis V (β-lactam resistance)	Cell Wall Biosynthesis	Cell Structure Biosynthesis	Biosynthesis
PWY-5531	3,8-divinyl-chlorophyllide a biosynthesis II (anaerobic)	Porphyrin Compound Biosynthesis	Cofactor, Prosthetic Group, Electron Carrier, and Vitamin Biosynthesis	Biosynthesis
PWY-2941	L-lysine biosynthesis II	Proteinogenic Amino Acid Biosynthesis	Amino Acid Biosynthesis	Biosynthesis
P241-PWY	coenzyme B biosynthesis	coenzyme B biosynthesis	Cofactor, Prosthetic Group, Electron Carrier, and Vitamin Biosynthesis	Biosynthesis
SUCSYN-PWY	sucrose biosynthesis I (from photosynthesis)	Sugar Biosynthesis	Carbohydrate Biosynthesis	Biosynthesis

## Sheet: Cluster 5
Cluster 5 (50 pathways)
Feature ID	Pathway	Level 3	Level 2	Level 1
PWY-7097	vanillin and vanillate degradation I	Vanillin Degradation	Aromatic Compound Degradation	Degradation/Utilization/Assimilation
PWY-6349	CDP-archaeol biosynthesis	Phospholipid Biosynthesis	Fatty Acid and Lipid Biosynthesis	Biosynthesis
PWY-3801	sucrose degradation II (sucrose synthase)	Sugar Degradation	Carbohydrate Degradation	Degradation/Utilization/Assimilation
PWY-7098	vanillin and vanillate degradation II	Vanillin Degradation	Aromatic Compound Degradation	Degradation/Utilization/Assimilation
P621-PWY	nylon-6 oligomer degradation	nylon-6 oligomer degradation	Degradation/Utilization/Assimilation - Other	Degradation/Utilization/Assimilation
PWY-6749	CMP-legionaminate biosynthesis I	Sugar Biosynthesis	Carbohydrate Biosynthesis	Biosynthesis
PWY-5420	catechol degradation II (meta-cleavage pathway)	Catechol Degradation	Aromatic Compound Degradation	Degradation/Utilization/Assimilation
PWY-6148	tetrahydromethanopterin biosynthesis	tetrahydromethanopterin biosynthesis	Cofactor, Prosthetic Group, Electron Carrier, and Vitamin Biosynthesis	Biosynthesis
PWY-6478	GDP-D-glycero-α-D-manno-heptose biosynthesis	Sugar Biosynthesis	Carbohydrate Biosynthesis	Biosynthesis
PWY-7295	L-arabinose degradation IV	Sugar Degradation	Carbohydrate Degradation	Degradation/Utilization/Assimilation
PWY-7373	superpathway of demethylmenaquinol-6 biosynthesis II	Quinol and Quinone Biosynthesis	Cofactor, Prosthetic Group, Electron Carrier, and Vitamin Biosynthesis	Biosynthesis
PWY-7332	superpathway of UDP-N-acetylglucosamine-derived O-antigen building blocks biosynthesis	Sugar Biosynthesis	Carbohydrate Biosynthesis	Biosynthesis
PWY-1501	mandelate degradation I	Mandelate Degradation	Aromatic Compound Degradation	Degradation/Utilization/Assimilation
PWY-5647	2-nitrobenzoate degradation I	Nitroaromatic Compound Degradation	Aromatic Compound Degradation	Degradation/Utilization/Assimilation
VALDEG-PWY	L-valine degradation I	Proteinogenic Amino Acid Degradation	Amino Acid Degradation	Degradation/Utilization/Assimilation
PWY-5088	L-glutamate degradation VIII (to propanoate)	Proteinogenic Amino Acid Degradation	Amino Acid Degradation	Degradation/Utilization/Assimilation
PWY-7031	protein N-glycosylation (bacterial)	Glycan Biosynthesis	Carbohydrate Biosynthesis	Biosynthesis
PWY-6992	1,5-anhydrofructose degradation	1,5-anhydrofructose degradation	1,5-anhydrofructose degradation	Generation of Precursor Metabolite and Energy
PWY-722	nicotinate degradation I	Nicotinate Degradation	Aromatic Compound Degradation	Degradation/Utilization/Assimilation
GOLPDLCAT-PWY	superpathway of glycerol degradation to 1,3-propanediol	Glycerol Degradation	Alcohol Degradation	Degradation/Utilization/Assimilation
PWY-5654	2-amino-3-carboxymuconate semialdehyde degradation to 2-hydroxypentadienoate	2-amino-3-carboxymuconate semialdehyde degradation to 2-hydroxypentadienoate	Carboxylate Degradation	Degradation/Utilization/Assimilation
PWY-6338	superpathway of vanillin and vanillate degradation	Vanillin Degradation	Aromatic Compound Degradation	Degradation/Utilization/Assimilation
PWY-6210	2-aminophenol degradation	2-aminophenol degradation	Aromatic Compound Degradation	Degradation/Utilization/Assimilation
PWY-6876	isopropanol biosynthesis (engineered)	isopropanol biosynthesis (engineered)	isopropanol biosynthesis (engineered)	Generation of Precursor Metabolite and Energy
P162-PWY	L-glutamate degradation V (via hydroxyglutarate)	Proteinogenic Amino Acid Degradation	Amino Acid Degradation	Degradation/Utilization/Assimilation
PWY-6505	L-tryptophan degradation XII (Geobacillus)	Proteinogenic Amino Acid Degradation	Amino Acid Degradation	Degradation/Utilization/Assimilation
PWY-5532	nucleoside and nucleotide degradation (archaea)	nucleoside and nucleotide degradation (archaea)	Nucleoside and Nucleotide Degradation	Degradation/Utilization/Assimilation
PWY-7198	pyrimidine deoxyribonucleotides de novo biosynthesis IV	2'-Deoxyribonucleotide Biosynthesis	Nucleoside and Nucleotide Biosynthesis	Biosynthesis
PWY-6174	mevalonate pathway II (archaea)	Terpenoid Biosynthesis	Secondary Metabolite Biosynthesis	Biosynthesis
PWY-6165	chorismate biosynthesis II (archaea)	Chorismate Biosynthesis	Aromatic Compound Biosynthesis	Biosynthesis
METHANOGENESIS-PWY	methanogenesis from H2 and CO2	Anaerobic Respiration	Respiration	Generation of Precursor Metabolite and Energy
METH-ACETATE-PWY	methanogenesis from acetate	Anaerobic Respiration	Respiration	Generation of Precursor Metabolite and Energy
PWY-6957	mandelate degradation to acetyl-CoA	Mandelate Degradation	Aromatic Compound Degradation	Degradation/Utilization/Assimilation
PWY-5677	succinate fermentation to butanoate	Fermentation to Short-Chain Fatty Acids	Fermentation	Generation of Precursor Metabolite and Energy
PWY-1361	benzoyl-CoA degradation I (aerobic)	Benzoyl-CoA Degradation	Aromatic Compound Degradation	Degradation/Utilization/Assimilation
PWY-7391	isoprene biosynthesis II (engineered)	Terpenoid Biosynthesis	Secondary Metabolite Biosynthesis	Biosynthesis
PWY-5655	L-tryptophan degradation IX	Proteinogenic Amino Acid Degradation	Amino Acid Degradation	Degradation/Utilization/Assimilation
PWY-5177	glutaryl-CoA degradation	glutaryl-CoA degradation	Carboxylate Degradation	Degradation/Utilization/Assimilation
CODH-PWY	reductive acetyl coenzyme A pathway I (homoacetogenic bacteria)	CO2 Fixation	C1 Compound Utilization and Assimilation	Degradation/Utilization/Assimilation
PWY-5430	meta cleavage pathway of aromatic compounds	Benzoate Degradation	Aromatic Compound Degradation	Degradation/Utilization/Assimilation
PWY-6654	phosphopantothenate biosynthesis III (archaebacteria)	Vitamin Biosynthesis	Cofactor, Prosthetic Group, Electron Carrier, and Vitamin Biosynthesis	Biosynthesis
PWY-5183	superpathway of aerobic toluene degradation	Toluene Degradation	Aromatic Compound Degradation	Degradation/Utilization/Assimilation
P163-PWY	L-lysine fermentation to acetate and butanoate	Proteinogenic Amino Acid Degradation	Amino Acid Degradation	Degradation/Utilization/Assimilation
P184-PWY	protocatechuate degradation I (meta-cleavage pathway)	Protocatechuate Degradation	Aromatic Compound Degradation	Degradation/Utilization/Assimilation
PWY-5419	catechol degradation to 2-hydroxypentadienoate II	Catechol Degradation	Aromatic Compound Degradation	Degradation/Utilization/Assimilation
PWY-7286	7-(3-amino-3-carboxypropyl)-wyosine biosynthesis	7-(3-amino-3-carboxypropyl)-wyosine biosynthesis	Nucleic Acid Processing	Macromolecule Modification
PWY-7210	pyrimidine deoxyribonucleotides biosynthesis from CTP	Pyrimidine Nucleotide Biosynthesis	Nucleoside and Nucleotide Biosynthesis	Biosynthesis
PWY-6948	sitosterol degradation to androstenedione	Steroid Degradation	Fatty Acid and Lipid Degradation	Degradation/Utilization/Assimilation
PWY-6350	archaetidylinositol biosynthesis	Phospholipid Biosynthesis	Fatty Acid and Lipid Biosynthesis	Biosynthesis
PWY-6404	superpathway of mycolyl-arabinogalactan-peptidoglycan complex biosynthesis	Cell Wall Biosynthesis	Cell Structure Biosynthesis	Biosynthesis
